# Supplementary material for: COVID-19 outbreak–related psychological distress among healthcare trainees: a cross-sectional study in China
Source: PubMed Central journal article supplement (PMC7577057; doi:10.1136/bmjopen-2020-041671), 2020-10-20
Supplement: bmjopen-2020-041671.draft_revisions.pdf [file bmjopen-2020-041671.draft_revisions.pdf]

# BMJ Open

BMJ Open is committed to open peer review. As part of this commitment we make the peer review history of every article we publish publicly available.

When an article is published we post the peer reviewers' comments and the authors' responses online. We also post the versions of the paper that were used during peer review. These are the versions that the peer review comments apply to.

The versions of the paper that follow are the versions that were submitted during the peer review process. They are not the versions of record or the final published versions. They should not be cited or distributed as the published version of this manuscript.

BMJ Open is an open access journal and the full, final, typeset and author-corrected version of record of the manuscript is available on our site with no access controls, subscription charges or pay-per-view fees (<http://bmjopen.bmj.com>).

If you have any questions on BMJ Open's open peer review process please email [info.bmjopen@bmj.com](mailto:info.bmjopen@bmj.com)

# BMJ Open

## COVID-19 outbreak-related psychological distress among health professional trainees : a cross-sectional study in China

|                               |                                                                                                                                                                                                                                                                                                                                                                                                                                                                                                                                                                                                                                                                               |
|-------------------------------|-------------------------------------------------------------------------------------------------------------------------------------------------------------------------------------------------------------------------------------------------------------------------------------------------------------------------------------------------------------------------------------------------------------------------------------------------------------------------------------------------------------------------------------------------------------------------------------------------------------------------------------------------------------------------------|
| Journal:                      | <i>BMJ Open</i>                                                                                                                                                                                                                                                                                                                                                                                                                                                                                                                                                                                                                                                               |
| Manuscript ID                 | bmjopen-2020-041671                                                                                                                                                                                                                                                                                                                                                                                                                                                                                                                                                                                                                                                           |
| Article Type:                 | Original research                                                                                                                                                                                                                                                                                                                                                                                                                                                                                                                                                                                                                                                             |
| Date Submitted by the Author: | 16-Jun-2020                                                                                                                                                                                                                                                                                                                                                                                                                                                                                                                                                                                                                                                                   |
| Complete List of Authors:     | Wang, Yue; Sichuan University, Mental health center<br>Li, Yuchen; Sichuan University, Mental health center; Karolinska Institute, Department of Medical Epidemiology and Biostatistics<br>Jiang, Jingwen; Sichuan University, West China Biomedical Big Data Center<br>Feng, Yuying; Sichuan University, Student Affairs Office<br>Song, Huan; Sichuan University, West China Biomedical Big Data Center; University of Iceland, Center of Public Health Sciences<br>zhang, wei; Sichuan University,<br>Lu, Donghao ; Karolinska Institutet Department of Medical Epidemiology and Biostatistics; Karolinska Institute, Department of Medical Epidemiology and Biostatistics |
| Keywords:                     | PSYCHIATRY, MENTAL HEALTH, MEDICAL EDUCATION & TRAINING, INTERNAL MEDICINE, EPIDEMIOLOGY                                                                                                                                                                                                                                                                                                                                                                                                                                                                                                                                                                                      |
|                               |                                                                                                                                                                                                                                                                                                                                                                                                                                                                                                                                                                                                                                                                               |

SCHOLARONE™  
Manuscripts

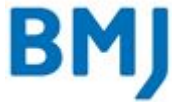

I, the Submitting Author has the right to grant and does grant on behalf of all authors of the Work (as defined in the below author licence), an exclusive licence and/or a non-exclusive licence for contributions from authors who are: i) UK Crown employees; ii) where BMJ has agreed a CC-BY licence shall apply, and/or iii) in accordance with the terms applicable for US Federal Government officers or employees acting as part of their official duties; on a worldwide, perpetual, irrevocable, royalty-free basis to BMJ Publishing Group Ltd ("BMJ") its licensees and where the relevant Journal is co-owned by BMJ to the co-owners of the Journal, to publish the Work in this journal and any other BMJ products and to exploit all rights, as set out in our [licence](#).

The Submitting Author accepts and understands that any supply made under these terms is made by BMJ to the Submitting Author unless you are acting as an employee on behalf of your employer or a postgraduate student of an affiliated institution which is paying any applicable article publishing charge ("APC") for Open Access articles. Where the Submitting Author wishes to make the Work available on an Open Access basis (and intends to pay the relevant APC), the terms of reuse of such Open Access shall be governed by a Creative Commons licence – details of these licences and which [Creative Commons](#) licence will apply to this Work are set out in our licence referred to above.

Other than as permitted in any relevant BMJ Author's Self Archiving Policies, I confirm this Work has not been accepted for publication elsewhere, is not being considered for publication elsewhere and does not duplicate material already published. I confirm all authors consent to publication of this Work and authorise the granting of this licence.

1  
2  
3 **COVID-19 outbreak-related psychological distress among health professional**  
4  
5  
6 **trainees : a cross-sectional study in China**  
7  
8  
9

10  
11 Yue Wang<sup>1#</sup>; Yuchen Li<sup>1,4#</sup>; Jingwen Jiang<sup>2</sup>; Yuying Feng<sup>3</sup>; Huan Song<sup>2,5\*</sup>; Wei Zhang<sup>1,2\*</sup>;  
12  
13 Donghao Lu<sup>4,6,7,8</sup>;  
14  
15

16  
17  
18 **Authors' institutions**  
19

- 20  
21 1. Mental Health Center, West China Hospital of Sichuan University, Chengdu, China;  
22  
23 2. West China Biomedical Big Data Center, West China Hospital, Sichuan University,  
24  
25 Chengdu, China;  
26  
27 3. Student Affairs Office, West China School of Medicine, Sichuan University, Chengdu,  
28  
29 China;  
30  
31 4. Department of Medical Epidemiology and Biostatistics, Karolinska Institute, Stockholm,  
32  
33 Sweden;  
34  
35 5. Center of Public Health Sciences, Faculty of Medicine, University of Iceland, Reykjavík,  
36  
37 Iceland;  
38  
39 6. Department of Epidemiology, Harvard T.H. Chan School of Public Health, Boston,  
40  
41 Massachusetts;  
42  
43 7. Channing Division of Network Medicine, Brigham and Women's Hospital, Harvard  
44  
45 Medical School, Boston, Massachusetts;  
46  
47 8. Clinical Research Center for Breast Diseases, West China Hospital, Sichuan University,  
48  
49 Chengdu, China;  
50  
51  
52  
53

54  
55 # Yue Wang and Yuchen Li contribute equally to the study.  
56

57  
58 \* Huan Song, and Wei Zhang contribute equally to the study.  
59  
60

1  
2  
3  
4  
5 **Correspondence:** Huan Song, MD, PhD, West China Biomedical Big Data Center, West  
6 China Hospital, Sichuan University, Guoxue Lane 37, Chengdu, China (e-mail:  
7  
8 songhuan@wchscu.cn) ; or Wei Zhang, MD, West China Biomedical Big Data Center, West  
9  
10 China Hospital, Sichuan University, Guoxue Lane 37, Chengdu, China (e-mail:  
11  
12 weizhanghx@163.com).  
13  
14  
15  
16  
17  
18  
19  
20  
21  
22  
23  
24  
25  
26  
27  
28  
29  
30  
31  
32  
33  
34  
35  
36  
37  
38  
39  
40  
41  
42  
43  
44  
45  
46  
47  
48  
49  
50  
51  
52  
53  
54  
55  
56  
57  
58  
59  
60

For peer review only

## Abstract

**Objectives** The COVID-19 outbreak is placing an enormous strain on the healthcare system, health professional trainees, as the future healthcare workforce, may be a vulnerable group. To assess psychological distress among health professional trainees during the COVID-19 outbreak are necessary.

**Design, setting and participants** A cross-sectional study including 4181 health professional trainees at Sichuan University in China during February 7-13, 2020. Participants were grouped according to training programs (2727 in Medicine, 944 in Medical Technology, and 513 in Nursing) and training stages (1791 undergraduates, 1890 postgraduates, and 503 residents).

**Main outcomes** COVID-19 outbreak-related psychological distress and acute stress reaction (ASR) were assessed by Kessler 6-item Psychological Distress Scale and the Impact of Event Scale-revised, respectively. We estimated odds ratios (ORs) of distress by comparing trainees across different programs and training stages using multivariable logistic regression.

**Results** Based on our survey, we identified 1150 (30.90%) participants with significant psychological distress and 403 (10.74%) had probable ASR. Compared to trainees of nursing, medicine trainees reported greater burden of psychological distress (OR 1.57, 95% CI 1.24-1.99) during the outbreak. No evident increase was found in trainees of medical technology. Compared to undergraduates, postgraduates or residents in medicine had a higher level of distress (ORs 1.62-1.66), whereas a lower burden endorsed by nursing residents (OR 0.35, 95% CI 0.19-0.63). Importantly, active clinical duty during the outbreak was significantly associated with distress (OR 1.31, 95% CI 1.10-1.57) in trainees, particularly in medicine trainees (OR 1.92, 95% CI 1.53-2.40) and in undergraduates (OR 4.24, 95% CI 1.62-11.80). We did not observe any clear risk pattern for ASR symptoms.

1  
2  
3 **Conclusions** Medicine trainees, particularly those at senior stages or with active clinical duty,  
4 are at risk for psychological distress during the COVID-19 outbreak. Stress management may  
5 be considered for high-risk health professional trainees.  
6  
7  
8  
9  
10  
11  
12  
13  
14  
15  
16  
17  
18  
19  
20  
21  
22  
23  
24  
25  
26  
27  
28  
29  
30  
31  
32  
33  
34  
35  
36  
37  
38  
39  
40  
41  
42  
43  
44  
45  
46  
47  
48  
49  
50  
51  
52  
53  
54  
55  
56  
57  
58  
59  
60

For peer review only

### Strengths and limitations of this study

- We comprehensively assessed psychological distress among health professional trainees across different programs and training stages during the COVID-19 outbreak.
- To shed light on the impact on their life/work, we also assessed concerns and needs during the outbreak as well as the influence on future career choice among trainees without active clinical duty, and evaluated work-family conflict and support among trainees with clinical duty.
- Our analyses were limited to the cross-sectional study design in a single medical school/teaching hospital, and results should be qualified by the possibility of interpretation constraints of the survey.



## Introduction

Globally, the ongoing pandemic of 2019 novel coronavirus disease (COVID-19) has caused 1,991,562 cases and 130,885 deaths as of April 16th, 2020<sup>1</sup>. Due to a drastic surge of COVID-19 patients, frontline healthcare workers were exposed to high workloads and at high risk for COVID-19. In addition, witnessing unexpected illnesses or deaths can be devastating. All these factors contributed to an elevated mental burden among healthcare workers. Indeed, emerging data indicated that Chinese healthcare workers exposed to COVID-19 suffered unfavorable psychological symptoms, especially among women, nurses, those in Wuhan (the first epicenter), and frontline workers<sup>2</sup>. Despite limited direct contacts with COVID-19 patients, health professional trainees, as the future healthcare workforce, may be a vulnerable group<sup>3</sup>. As the pandemic escalates, many countries are considering or already graduating senior students early to aid the frontline workers. More aggressive approaches have also been proposed, for instance, suspending all medical schools for one year and recruiting medical students to test, track and quarantine COVID-19<sup>4</sup>. Although many are inspired at these unprecedented times, some, especially the ones without sufficient clinical experience, may be stressed. We therefore aimed to assess the prevalence of psychological distress and acute stress reaction (ASR) among health professional trainees across different programs and training stages in response to the COVID-19 outbreak.

## Materials and methods

### Study design

We conducted a cross-sectional study of health professional trainees from the West China School of Medicine and West China Hospital, Sichuan University. During February 7-13, 2020, we invited all eligible individuals to participate through online questionnaires regarding

1  
2  
3 basic characteristics and COVID-19 outbreak-related mental health (Supplementary Figure 1  
4  
5 Research Flow Chart).  
6  
7  
8  
9

10 For undergraduates and graduates who were not involved in clinical work, we exclusively  
11 asked their main concerns and needs during the COVID-19 epidemic, as well as the impact of  
12 such an experience on their future career plan; whereas clinical workers were prompted to a  
13 short survey about work-family conflict and support. In total, we included 1818  
14 undergraduates (participation rate 73.22%), 1863 postgraduates (71.49%), and 503 residents  
15 (24.12%). This study was approved by the Ethics Committee of the Sichuan University and  
16 electronic consent forms were obtained from all participants.  
17  
18  
19  
20  
21  
22  
23  
24  
25  
26  
27

28 Due to the Chinese Spring Festival, most undergraduate and postgraduate students were at  
29 home across the entire country during the COVID-19 outbreak period, while all residents  
30 remained in Chengdu, Sichuan Province due to clinical duties. As of 6 February 2020, the  
31 total number of confirmed COVID-19 cases was 344 in Sichuan (102 in Chengdu), and 7,226  
32 individuals were under medical observation<sup>5</sup>.  
33  
34  
35  
36  
37  
38  
39  
40  
41

### 42 **Health professional programs and training stages**

43  
44 The health professional training programs in China mainly consist of medicine, medical  
45 technology and nursing, which train for future doctors, medical technologists (including  
46 medical laboratory technologists, imaging technologists, physical therapists, optometrists,  
47 etc.), and nurses. Training stages was classified into undergraduates, postgraduates, and  
48 residents. Briefly, all training programs start from undergraduate programs, of which  
49 medicine program is 5 years and program of medical technology/nursing is 4 years. After  
50  
51  
52  
53  
54  
55  
56  
57  
58  
59  
60

1  
2  
3 that, individuals continue training in postgraduate program (3-6 years) with a primary focus  
4 on research, while clinical training could be combined. For those who pursue a career as a  
5 clinician, either after the undergraduate or postgraduate program, they enter residency  
6 program (3 years for medicine and 2 years for medical Technology/nursing) for supervised  
7 clinical work.  
8  
9  
10  
11  
12  
13  
14  
15  
16

17 As stated above, due to the co-occurrence with the Chinese Spring Festive, individuals at  
18 early training stage had a low proportion of clinical work exposure at the time of survey. In  
19 addition, in order to protect students without clinical experience, the medical school canceled  
20 clinical practice for undergraduates since the outbreak of COVID-19, while few of senior  
21 undergraduates that had internship experiences volunteered to stay and support the clinical  
22 work. The active clinical workers included 503 residents and 325 students (304  
23 postgraduates and 21 undergraduates). To assess the working status of the trainees, we asked  
24 all participants "Are you active in clinical duty at this moment" in the survey.  
25  
26  
27  
28  
29  
30  
31  
32  
33  
34  
35  
36  
37

### 38 **Assessment of outbreak-related psychological distress**

39 We assessed psychological distress and acute stress reaction (ASR) and phrased the questions  
40 specific to COVID-19 outbreak.  
41  
42  
43  
44  
45  
46

47 Psychological distress was assessed by the Chinese version of Kessler 6-item Psychological  
48 Distress Scale (K6). It consists of six items about major depression and generalized anxiety  
49 disorder and asks respondents how frequently they experienced these symptoms in the past  
50 month<sup>6</sup>. Each item has five ordinal options (from 0 = "never" to 4 = "all of the time"), and the  
51 total score ranges from 0 to 24. We considered a score  $\geq 5$  as clinically significant distress  
52  
53  
54  
55  
56  
57  
58  
59  
60

1  
2  
3 according to validation studies in Asian populations <sup>7,8</sup>. The Cronbach's alpha value was  
4  
5 0.912 in our study, suggesting a good scale reliability.  
6  
7  
8  
9

10 Acute stress reaction was evaluated by the Chinese version Impact of Event Scale-revised  
11 (ISE-R)<sup>9</sup>. It consists of 22 items related to intrusion, avoidance and hyperarousal  
12  
13 posttraumatic symptoms and asked subjects how much they distressed or bothered during the  
14  
15 past seven days. Responses were based on a 5-point rating scale, ranging from 0 “not at all”  
16  
17 to 4 “extremely”. Individuals with a score  $\geq 24$  is considered as a probable ASR <sup>10,11</sup>. The  
18  
19 Cronbach  $\alpha$  value was 0.907 in our study, suggesting a good scale reliability.  
20  
21  
22  
23  
24  
25

### 26 **Assessment of outbreak impact**

27  
28 To shed light on the impact on their life/work, we assessed concerns and needs during the  
29  
30 outbreak as well as the influence on future career choice among trainees without active  
31  
32 clinical duty, and evaluated work-family conflict and support among trainees with clinical  
33  
34 duty.  
35  
36  
37  
38  
39

40 Concerns, needs during the outbreak, and the influence on future career choice: to understand  
41  
42 the main concerns and needs, we asked “Under the current circumstances, I am concerned  
43  
44 about a) being infected with novel coronavirus; b) my physical health condition; c) my  
45  
46 psychological health; d) academic performance; e) my social life/work; f) my traveling plan;  
47  
48 g) the risk of infection for family members or friends; h) my personal or family financial  
49  
50 situation; i) other things”; and “If I were to work during the outbreak, I need a) personal  
51  
52 protective equipment; b) social insurance; c) salary incentives; d) clinical practice guidance;  
53  
54 e) professional track record; f) others.” Multiple choices were allowed for these questions. To  
55  
56  
57  
58  
59  
60

1  
2  
3 understand the effects on future career choice, we used one single question “Has the outbreak  
4 affected your future career plan?” to assess the impact of COVID-19 outbreak on their career  
5  
6  
7  
8 plan.  
9

10  
11  
12 Work-family conflict and support: The 9-item Chinese version of “Work-Family Conflict and  
13 Support” scale was used to investigate work-family conflict, social support, and policy  
14  
15 support<sup>12</sup>. Each dimension has three items with three ordinal options (1 = "agree",  
16  
17 2="neutral", and 3 = "disagree").  
18  
19  
20  
21  
22  
23

### 24 **Statistical Analysis**

25  
26 First, we compared the baseline characteristics of trainees across different programs (i.e.,  
27  
28 medicine, medical technology, and nursing) using student t-test (for continuous variables)  
29  
30 and Chi-square test (for categorical variables). Next, we calculated the prevalence of  
31  
32 psychological distress and probable ASR across different training programs, stages, and  
33  
34 status of clinical duty. We estimated coefficients ( $\beta$ s) and odds ratios (ORs) of distress and  
35  
36 ASR symptom scores using linear regression and probable cases using logistic regression. All  
37  
38 models were adjusted for age and sex (male or female), and additionally adjusted for training  
39  
40 program when analyzing the status of clinical duty. Furthermore, among participants without  
41  
42 active clinical duty, we examined the associations of concerns, needs and future career choice  
43  
44 with distress/ASR; for those with active clinical duty, we assessed the associations of family-  
45  
46 work conflicts with distress/ASR. All analyses were conducted in R 3.6.1.  $P < 0.05$  was  
47  
48  
49  
50 considered as statistical significance.  
51  
52  
53  
54  
55

### 56 **Results**

### Demographic characteristics

In a total of 4184 trainees, the mean age was  $23.41 \pm 3.81$  years and 64.89% were females. While no confirmed COVID-19 was reported, 31 (0.74%) of them had at least one relative being infected. About one-fifth (19.79%) of participants were active in clinical duty; among then, 74 (8.94%) were working in the front line and 38 (4.59%) had direct contact with COVID-19 (Table 1). Compared with trainees in medical technology/nursing program, medicine trainees were older, and more likely to be postgraduates, males, married, and outside of Hubei Province – the first epicenter ( $P < 0.05$ ). At the time of the survey, nurse trainees were more likely to have active clinical duty and work in the front line ( $P < 0.05$ ).

### Outbreak-related Psychological distress and Acute Stress Reaction

During the outbreak, significant psychological distress was endorsed by 1150 (30.90%) trainees and probable ASR in 403 (10.74%) participants. Compared to nurse training, medicine training was positively associated with distress symptoms ( $\beta$  0.26, 95% CI 0.15-0.36) and cases of significant distress (OR 1.57, 95% CI 1.24-1.99; Table 2). Similar pattern was found for medical technology training program, although the association with distress cases was not significant. Compared with undergraduates, postgraduates or residents in medicine program had a higher level of distress, whereas a lower burden endorsed by nursing residents. No evident increase was found across training stages in trainees of medical technology. Similar patterns, yet weaker associations, were observed for ASR symptoms and probable cases across training programs as well as training stages within a program, except for lower burden of ASR reported in medicine residents compared to undergraduates.

Moreover, active clinical duty during the outbreak was positively associated with both

1  
2  
3 distress symptoms ( $\beta$  0.15, 95% CI 0.07-0.24) and cases of significant distress (OR 1.31,  
4 95% CI 1.10-1.57; Table 3). Interestingly, the association between active duty and distress  
5 was positive in medicine trainees, but negative in nursing trainees. The association was  
6 slightly stronger in undergraduates than that in postgraduates. However, active clinical duty  
7 was negatively associated with ASR symptoms ( $\beta$  -0.08, 95% CI -0.17, -0.00), and except for  
8 that, no significant association across training program and stages were found for ASR.  
9  
10  
11  
12  
13  
14  
15  
16  
17  
18

### 19 **Outbreak impact among vulnerable trainees**

20  
21 Among trainees without active clinical duty during the outbreak, individuals who showed  
22 significant distress were most concerned of mental health (OR 2.41, 95% CI 1.91-3.05; Table  
23 4) and strongly demanded personal protective equipment if they were to work during the  
24 outbreak (OR 1.50, 95% CI 1.07-2.15). Moreover, they were more likely to consider future  
25 career outside of medicine (OR 2.91, 95% CI 1.79-4.73). Similar pattern was noted for ASR,  
26 except for concerns of academic performance, travel plans, personal/family financial situation  
27 and needs of personal protective equipment, which only associated with psychological  
28 distress.  
29  
30  
31  
32  
33  
34  
35  
36  
37  
38  
39  
40  
41

42 Among trainees with active clinical duty, individuals with distress were more likely to report  
43 work-family conflicts (ORs 2.03-2.77; Table 5). By contrast, adequate social support (ORs  
44 0.40-0.48) or reasonable work arrangements (ORs 0.38-0.43) were associated with lower  
45 psychological distress. Similar pattern was found for ASR.  
46  
47  
48  
49  
50  
51  
52  
53

### 54 **Discussion**

55  
56 In this large-scale cross-sectional study, we found that psychological distress is common  
57  
58  
59  
60

1  
2  
3 among health professional trainees during the COVID-19 outbreak. Moreover, medicine  
4 trainees, particularly those at senior stages or with active clinical duty, were at higher risk for  
5 psychological distress, compared to those in other training programs or at the earlier training  
6 stage. Concerns of mental health condition was strongly correlated with psychological  
7 distress among trainees with no clinical duty, whereas work-family conflicts highly concern  
8 distressed trainees with active clinical duty.  
9

10  
11  
12  
13  
14  
15  
16  
17  
18  
19 The COVID-19 outbreak is placing an enormous strain on the healthcare system, and medical  
20 trainees alongside with health professional workers are all in challenging situation<sup>3</sup>. In line  
21 with prior findings among healthcare workers<sup>2, 13, 14</sup>, our results suggested that psychological  
22 distress were also common among health professional trainees, especially the ones in  
23 medicine training program. Conversely, several studies reported that nurses providing care to  
24 COVID-19 confirmed or suspected patients, had a greater mental health burden than doctors  
25<sup>2, 15</sup>. Given that only a small proportion of our participants (4.59%) had direct contact with  
26 COVID-19 patients, these diverse estimates do not necessarily invalidate each other.  
27  
28  
29  
30  
31  
32  
33  
34  
35  
36  
37  
38  
39

40 Another important finding is the association of advanced training stage and active clinical  
41 duty with elevated level of psychological distress. Academic pressure, workload as well as  
42 financial burden can increase with the level of training, which could consequently increase  
43 the mental vulnerability of senior trainees and ultimately contribute to their negative mental  
44 outcomes<sup>16-20</sup>. Moreover, during the COVID-19 outbreak, to deal with the considerable  
45 workforce shortage in healthcare system, senior medical students and residents have been  
46 encouraged to aid clinical work<sup>21, 22</sup>. The overwhelming workload and high risk of exposure  
47 to COVID-19 may add further burden to mental health of this specific population. Indeed,  
48  
49  
50  
51  
52  
53  
54  
55  
56  
57  
58  
59  
60



1  
2  
3 across different training stages, we consistently observed a higher risk of psychological  
4 distress among individuals who were involved in active clinical duties during the outbreak.  
5  
6  
7

8  
9  
10 ASR often develop following the direct exposure to traumatic events, such as experiencing  
11 the outbreak in the epicenter <sup>23</sup> and directly diagnosing/treating COVID-19 confirmed  
12 patients <sup>2,23</sup>. However, only a few of our participants were quarantined in the epicenter or had  
13 direct contact with COVID-19 patients at the time of the survey. The risk of ASR was  
14 therefore relatively low and the difference between training programs/stages were small.  
15 Interestingly, we found active clinical duty trainees had less ASR symptoms during the  
16 outbreak.  
17  
18  
19  
20  
21  
22  
23  
24  
25  
26  
27

28 Our findings suggested that being infected by COVID-19 was the leading concern in health  
29 professional trainees, followed by concerns of mental health, with regards to the risk of  
30 psychological distress and ASR. In addition, adequate personal protective equipment and  
31 salary incentives may help reduce the level of psychological distress. This is in line with the  
32 previous finding that family income stability was a protective factor for medical college  
33 students to against anxiety <sup>24</sup>. Moreover, among clinical workers, work-family conflicts were  
34 positively associated with psychological distress, whilst we observed reversed association for  
35 the social supports. Altogether, in order to reduce the possibility of psychological distress  
36 among healthcare trainees, adequate personal protection, timely psychological intervention,  
37 stable financial situation, and strong family and social support may be the key things to be  
38 considered. Of note, the proper leadership including active participation in outbreak  
39 preparedness and making reasonable work arrangements could also alleviate the emotional  
40 strain in healthcare workers <sup>25</sup>, suggesting the importance of working polices to health  
41  
42  
43  
44  
45  
46  
47  
48  
49  
50  
51  
52  
53  
54  
55  
56  
57  
58  
59  
60

1  
2  
3 professional trainees.  
4  
5  
6  
7

8 Studies have implied that experiencing psychological distress during the training stage may  
9  
10 lead to an altered career path <sup>26-28</sup>. This is consistent with our finding that, health professional  
11  
12 trainees who decided to work on non-medical fields in the future tend to suffer higher level of  
13  
14 psychological distress, compared to the ones determined to continue. During the COVID-19  
15  
16 outbreak, health professional trainees may be mentally vulnerable to the crisis, because of  
17  
18 being knowledgeable about medicine which made them more aware of danger at the early  
19  
20 stage of outbreak. Meanwhile, the epidemic represents an extreme situation that 'doctor' was  
21  
22 considered as a demanding job with social responsibilities, which might scare or inspire  
23  
24 medical trainees, especially the ones without clinical experience. It is therefore interpretable  
25  
26 that this crisis also has influenced the choice of future career path among this population.  
27  
28  
29  
30  
31  
32

### 33 **Limitations**

34  
35 Our study has several limitations. First, the response rate was low in residents and the non-  
36  
37 participants were more likely to be the ones with severe stress. The participation rate of  
38  
39 undergraduate/postgraduate trainees was satisfiable (73.22% and 71.49% respectively). Such  
40  
41 selection is less likely to entirely explain our findings. Second, we only measured distress  
42  
43 symptoms once in the early phase of the outbreak. As the symptoms may change over time <sup>29-</sup>  
44  
45 <sup>32</sup>, longitudinal studies are needed in future. Third, although the effects of age, sex, training  
46  
47 programs and training stages were adjusted in the data analysis, residual confounding remains  
48  
49 because additional confounding factors were inapplicable (i.e. marital status, current location,  
50  
51 working position, etc.) or not collected (i.e. social economic status). Last, although the  
52  
53 trainees came from all parts of the country, our study is based on a single medical  
54  
55  
56  
57  
58  
59  
60

1  
2  
3 school/teaching hospital. Further studies from independent populations are warranted.  
4  
5  
6  
7

## 8 **Conclusions**

9  
10 Our findings suggest that psychological distress in response to the COVID-19 outbreak is  
11  
12 common among health professional trainees in China. Medicine trainees, particularly those at  
13  
14 senior stages or with active clinical duty, were at higher risk for psychological distress. Stress  
15  
16 management may be provided for high-risk health professional trainees during the outbreak,  
17  
18 particularly if and when accelerating to join the frontline workforce.  
19  
20  
21  
22

23  
24 **Acknowledgments:** The authors thank Lie Zhang (West China School of Medicine of  
25  
26 Sichuan University, Chengdu, China) for coordinating the data collection; Fenfen Ge (West  
27  
28 China Hospital of Sichuan University, Chengdu, China), Ting Liu (West China Hospital of  
29  
30 Sichuan University, Chengdu, China) and Xiao Liao (Southwest University, Chongqing,  
31  
32 China) for data collection. Mr Zhang, Miss Ge, Miss Liu and Miss Liao have no conflicts of  
33  
34 interest to declare. We also thank the participating students at the West China School of  
35  
36 Medicine.  
37  
38  
39  
40  
41

42  
43 **Contributors:** Drs Zhang, Lu and Song had full access to all of the data in the study and take  
44  
45 responsibility for the integrity of the data and the accuracy of the data analysis. Wang and Li  
46  
47 contributed equally to the work.  
48

49 *Concept and design:* Wang, Li, Zhang.

50  
51 *Acquisition, analysis, or interpretation of data:* Wang, Li, Song, Feng.

52  
53 *Drafting of the manuscript:* Wang, Li, Song, Lu.

54  
55  
56 *Critical revision of the manuscript for important intellectual content:* all authors.  
57  
58  
59  
60

1  
2  
3 *Statistical analysis:* Wang, Jiang.  
4

5 *Obtained funding:* Zhang, Song, Lu.  
6

7 *Administrative, technical, or material support:* Zhang, Song, Lu, Feng.  
8

9 *Supervision:* Zhang, Song, Lu.  
10  
11

12 All authors have contributed significantly to this work and have met the qualification of  
13 authorship.  
14  
15

16  
17  
18  
19 **Funding:** This research was supported by the National Natural Science Foundation of China  
20 (No. 81971262 to Dr. Song, No. 81801359 to Dr. Lu), Swedish Research Council (No. 2018-  
21 00648 to Dr. Lu), West China Hospital COVID-19 Epidemic Science and Technology Project  
22 (No. HX-2019-nCoV-014 to Dr. Song, No. HX-2019-nCoV-019 to Dr. Zhang), and Sichuan  
23 University Emergency Grant (No. 2020scunCoVyingji1002 to Dr. Song, No.  
24 2020scunCoVyingji1005 to Dr. Zhang).  
25  
26  
27  
28  
29  
30  
31  
32  
33  
34

35 **Competing interests:** All authors declare no competing interests.  
36  
37  
38  
39

40 **Patient and public involvement:** Patients and/or the public were not involved in the design,  
41 or conduct, or reporting, or dissemination plans of this research.  
42  
43  
44  
45  
46  
47

48 **Ethics approval:** This study was approved by the Ethics Committee of the Sichuan  
49 University.  
50  
51  
52  
53

54 **Data availability statement:** The data that support the findings of this study are available  
55 from the corresponding author, WZ, upon reasonable request.  
56  
57  
58  
59  
60

## Reference

1. WHO. World Health Organization: Coronavirus disease (COVID-19) outbreak situation. World Health Organization, 2020.
2. Lai J, Ma S, Wang Y, Cai Z, Hu J, Wei N, et al. Factors Associated With Mental Health Outcomes Among Health Care Workers Exposed to Coronavirus Disease 2019. *JAMA Network Open*. 2020; 3(3): e203976-e.
3. Baker DM, Bhatia S, Brown S, Cambridge W, Kamarajah SK, A K, et al. Medical student involvement in the COVID-19 response. *Lancet*. 2020; 395(10232): 1254.
4. Bauchner H, Sharfstein J. A Bold Response to the COVID-19 Pandemic: Medical Students, National Service, and Public Health. *JAMA*. 2020.
5. Health Commission of Sichuan Province C. The latest situation of new coronavirus pneumonia in Sichun province (released on February 7, 2020). (ed HCoS Province). Available from: <https://dwz.cn/Y1p9dhTI>, 2020.
6. Kang Y-k, Guo W-J, Xu H, Chen Y-h, Li X-j, Tan Z-p, et al. The 6-item Kessler psychological distress scale to survey serious mental illness among Chinese undergraduates: Psychometric properties and prevalence estimate. *Comprehensive Psychiatry*. 2015; 63.
7. Furukawa TA, Kawakami N, Saitoh M, Ono Y, Nakane Y, Nakamura Y, et al. The performance of the Japanese version of the K6 and K10 in the World Mental Health Survey Japan. *International Journal of Methods in Psychiatric Research*. 2008; 17(3): 152-8.
8. Kessler RC, Green JG, Gruber MJ, Sampson NA, Bromet E, Cuitan M, et al. Screening for serious mental illness in the general population with the K6 screening scale: results from the WHO World Mental Health (WMH) survey initiative (vol 19, pg 4, 2010). *International Journal of Methods in Psychiatric Research*. 2011; 20(1): 62-.
9. Wu KK, Chan KS. The development of the Chinese version of Impact of Event Scale--Revised (CIES-R). (0933-7954 (Print)).
10. Lai YH, Lee YH, Chen YR, Hung YJ. Psychometric Testing of the Impact of Event Scale-Revised (IES-R) Chinese Version and Current Status in Three Major Types of Cancer Survivors in Taiwan. *Psycho-Oncology*. 2014; 23: 156-.
11. Imsiragic AS, Begic D, Martic-Biocina S. Acute Stress and Depression 3 Days after Vaginal Delivery - Observational, Comparative Study. *Collegium Antropologicum*. 2009; 33(2): 521-7.
12. HUANG D, YIN W, ZHANG Y, WANG P, SUN K. Effects of Social and Policy Supports on Work-family Conflict in Physicians. *Chinese Mental Health Journal*. 2009; 23(01): 27-32.
13. Liu C, Yang Y-z, Zhang XM, Xu X, Dou Q-L, Zhang W-W. The prevalence and influencing factors for anxiety in medical workers fighting COVID-19 in China: A cross-sectional survey. *medRxiv*. 2020: 2020.03.05.20032003.
14. Zhang W-R, Wang K, Yin L, Zhao W-F, Xue Q, Peng M, et al. Mental Health and Psychosocial

1  
2  
3 Problems of Medical Health Workers during the COVID-19 Epidemic in China. *Psychotherapy and*  
4 *psychosomatics*. 2020: 1-9.

5  
6 15. Liu ZR, Han B, Jiang RM, Huang YQ, Ma C, Wen J, et al. Mental Health Status of Doctors and  
7 Nurses During COVID-19 Epidemic in China (3/4/2020). Available from:  
8 <http://dxdoiorg/102139/ssrn3551329>.

9  
10 16. Dyrbye L, Thomas M, Shanafelt T. Medical Student Distress: Causes, Consequences, and  
11 Proposed Solutions. *Mayo Clinic proceedings Mayo Clinic*. 2006; 80: 1613-22.

12  
13 17. Chunming WM, Harrison R, MacIntyre R, Travaglia J, Balasooriya C. Burnout in medical students:  
14 a systematic review of experiences in Chinese medical schools. *BMC Medical Education*. 2017; 17(1):  
15 217.

16  
17 18. Levey RE. Sources of stress for residents and recommendations for programs to assist them. *Acad*  
18 *Med*. 2001; 76(2): 142-50.

19  
20 19. Dyrbye LN, Thomas MR, Massie FS, Power DV, Eacker A, Harper W, et al. Burnout and suicidal  
21 ideation among U.S. medical students. *Ann Intern Med*. 2008; 149(5): 334-41.

22  
23 20. Moffat KJ, McConnachie A Fau - Ross S, Ross S Fau - Morrison JM, Morrison JM. First year  
24 medical student stress and coping in a problem-based learning medical curriculum. (0308-0110 (Print)).

25  
26 21. Stokes DC. Senior Medical Students in the COVID-19 Response: An Opportunity to Be Proactive.  
27 *Academic emergency medicine : official journal of the Society for Academic Emergency Medicine*. 2020;  
28 27(4): 343-5.

29  
30 22. Services CfMM. Teaching Hospitals, Teaching Physicians and Medical Residents: CMS  
31 Flexibilities to Fight COVID-19. (ed CfMM Services): 2020.

32  
33 23. Sun L, Sun Z, Wu L, Zhu Z, Zhang F, Shang Z, et al. Prevalence and Risk Factors of Acute  
34 Posttraumatic Stress Symptoms during the COVID-19 Outbreak in Wuhan, China. *medRxiv*. 2020:  
35 2020.03.06.20032425.

36  
37 24. Cao W, Fang Z, Hou G, Han M, Xu X, Dong J, et al. The psychological impact of the COVID-19  
38 epidemic on college students in China. *Psychiatry research*. 2020; 287: 112934.

39  
40 25. Mason DJ, Friese CR. Protecting health care workers against COVID-19—and being prepared for  
41 future pandemics. *JAMA Health Forum*. 2020; 1(3):e200353.

42  
43 26. Melincavage SM. Student nurses' experiences of anxiety in the clinical setting. (1532-2793  
44 (Electronic)).

45  
46 27. Hawkins M. 2017 Final Year Medical Residents Survey. 2018.

47  
48 28. Scharer S, Freitag A. Physicians' exodus: why medical graduates leave Austria or do not work in  
49 clinical practice. (1613-7671 (Electronic)).

50  
51 29. Leung GM, Ho L-M, Chan SKK, Ho S-Y, Bacon-Shone J, Choy RYL, et al. Longitudinal assessment  
52 of community psychobehavioral responses during and after the 2003 outbreak of severe acute  
53 respiratory syndrome in Hong Kong. *Clinical infectious diseases : an official publication of the Infectious*  
54 *Diseases Society of America*. 2005; 40(12): 1713-20.

55  
56 30. Pietrzak RH, Tracy M, Galea S, Kilpatrick DG, Ruggiero KJ, Hamblen JL, et al. Resilience in the  
57

1  
2  
3 Face of Disaster: Prevalence and Longitudinal Course of Mental Disorders following Hurricane Ike.  
4 PLOS ONE. 2012; 7(6): e38964.  
5

6 31. James PB, Wardle J, Steel A, Adams J. Post-Ebola psychosocial experiences and coping  
7 mechanisms among Ebola survivors: a systematic review. Trop Med Int Health. 2019; 24(6): 671-91.  
8

9 32. Ye Y, Fan F, Li LY, Han QG. Trajectory and predictors of depressive symptoms among adolescent  
10 survivors following the Wenchuan earthquake in China: a cohort study. Social Psychiatry and  
11 Psychiatric Epidemiology. 2014; 49(6): 943-52.  
12  
13  
14  
15  
16  
17  
18  
19  
20  
21  
22  
23  
24  
25  
26  
27  
28  
29  
30  
31  
32  
33  
34  
35  
36  
37  
38  
39  
40  
41  
42  
43  
44  
45  
46  
47  
48  
49  
50  
51  
52  
53  
54  
55  
56  
57  
58  
59  
60

For peer review only

Table 1 Characteristics of health professional trainees – N (%) or mean (SD).

|                                           | All          | Medicine     | Medical technology | Nursing      | P     |
|-------------------------------------------|--------------|--------------|--------------------|--------------|-------|
| <b>Participants, N</b>                    | 4184         | 2727 (65.18) | 944 (22.56)        | 513 (12.26)  |       |
| <b>Age, years, mean (SD)</b>              | 23.41 (3.81) | 24.20 (3.84) | 21.90 (3.24)       | 21.98 (3.36) | <0.01 |
| <b>Training stage</b>                     |              |              |                    |              | <0.01 |
| Undergraduates                            | 1791 (42.81) | 940 (34.47)  | 588 (62.29)        | 263 (51.27)  |       |
| Postgraduates                             | 1890 (45.17) | 1662 (60.95) | 142 (15.04)        | 86 (16.76)   |       |
| Residents                                 | 503 (12.02)  | 125 (4.58)   | 214 (22.67)        | 164 (31.97)  |       |
| <b>Sex</b>                                |              |              |                    |              | <0.01 |
| Male                                      | 1469 (35.11) | 1133 (41.55) | 265 (28.07)        | 71 (13.84)   |       |
| Female                                    | 2715 (64.89) | 1594 (58.45) | 679 (71.93)        | 442 (86.16)  |       |
| <b>Marital status</b>                     |              |              |                    |              | <0.01 |
| Married                                   | 331 (7.91)   | 254 (9.31)   | 48 (5.08)          | 29 (5.65)    |       |
| Unmarried                                 | 3853 (92.09) | 2473 (90.69) | 896 (94.92)        | 484 (94.35)  |       |
| <b>Location</b>                           |              |              |                    |              | 0.02  |
| Hubei <sup>a</sup>                        | 67 (1.60)    | 46 (1.69)    | 20 (2.12)          | 1 (0.19)     |       |
| Outside Hubei                             | 4117 (98.40) | 2681 (98.31) | 924 (97.88)        | 512 (99.81)  |       |
| <b>Relatives with COVID-19</b>            |              |              |                    |              | 0.90  |
| No                                        | 4153 (99.26) | 2706 (99.23) | 937 (99.26)        | 510 (99.42)  |       |
| Yes                                       | 31 (0.74)    | 21 (0.77)    | 7 (0.74)           | 3 (0.58)     |       |
| <b>Active clinical duty</b>               |              |              |                    |              | <0.01 |
| No                                        | 3356 (80.21) | 2301 (84.38) | 719 (76.17)        | 336 (65.50)  |       |
| Yes                                       | 828 (19.79)  | 426 (15.62)  | 225 (23.83)        | 177 (34.50)  |       |
| <b>Working position <sup>b</sup></b>      |              |              |                    |              | <0.01 |
| Frontline <sup>c</sup>                    | 74 (8.94)    | 36 (8.54)    | 5 (2.22)           | 33 (18.64)   |       |
| Second-line                               | 754 (91.06)  | 390 (91.55)  | 220 (97.78)        | 144 (81.36)  |       |
| <b>Contact with COVID-19 <sup>b</sup></b> |              |              |                    |              | 0.11  |
| Yes                                       | 38 (4.59)    | 24 (5.63)    | 11 (4.89)          | 3 (1.69)     |       |
| No                                        | 790 (95.41)  | 402 (94.37)  | 214 (95.11)        | 174 (98.31)  |       |

a. Hubei Province was the epicenter at the time of the survey.

b. Information was only assessed for participants with activity clinical duty.

c. Frontline working positions was defined as working in departments directly engaging in care for patients with COVID-19, including Emergency, Respiratory, Critical Care Medicine, and Infectious Disease Departments.



Table 2 Psychological distress and Acute stress reaction among health professional trainees between different training programs and stages.

|                           | Psychological distress <sup>a</sup> |                         |             |                          | Acute stress reaction <sup>b</sup> |                         |             |                          |
|---------------------------|-------------------------------------|-------------------------|-------------|--------------------------|------------------------------------|-------------------------|-------------|--------------------------|
|                           | Symptoms                            |                         | Cases       |                          | Symptoms                           |                         | Cases (403) |                          |
|                           | Mean±SD                             | β (95% CI) <sup>c</sup> | N (%)       | OR (95% CI) <sup>c</sup> | Mean±SD                            | β (95% CI) <sup>c</sup> | N (%)       | OR (95% CI) <sup>c</sup> |
| <b>Training program</b>   |                                     |                         |             |                          |                                    |                         |             |                          |
| Medicine                  | 0.06±1.05                           | 0.26 (0.15, 0.36)       | 792 (33.22) | 1.57 (1.24, 1.99)        | 0.01±1.01                          | 0.14 (0.04, 0.24)       | 256 (10.66) | 1.11 (0.80, 1.55)        |
| Medical technology        | -0.07±0.92                          | 0.14 (0.03, 0.25)       | 242 (27.94) | 1.26 (0.97, 1.63)        | 0.03±0.99                          | 0.13 (0.02, 0.24)       | 96 (11.00)  | 1.08 (0.76, 1.56)        |
| Nursing                   | -0.18±0.85                          | Ref.                    | 116 (24.58) | Ref.                     | -0.08±0.95                         | Ref.                    | 51 (10.71)  | Ref.                     |
| <b>Medicine</b>           |                                     |                         |             |                          |                                    |                         |             |                          |
| <i>By training stage</i>  |                                     |                         |             |                          |                                    |                         |             |                          |
| Undergraduates            | -0.10±0.99                          | Ref.                    | 223 (26.05) | Ref.                     | -0.01±1.06                         | Ref.                    | 86 (9.92)   | Ref.                     |
| Postgraduates             | 0.16±1.08                           | 0.26 (0.13, 0.40)       | 529 (37.23) | 1.66 (1.25, 2.19)        | 0.02±0.99                          | 0.06 (-0.08, 0.19)      | 163 (11.39) | 1.22 (0.80, 1.87)        |
| Residents                 | 0.10±0.90                           | 0.19 (-0.04, 0.41)      | 40 (37.38)  | 1.62 (1.02, 2.56)        | -0.07±0.84                         | -0.06 (-0.28, 0.17)     | 7 (6.73)    | 0.65 (0.25, 1.43)        |
| <b>Medical technology</b> |                                     |                         |             |                          |                                    |                         |             |                          |
| <i>By training stage</i>  |                                     |                         |             |                          |                                    |                         |             |                          |
| Undergraduates            | -0.07±0.97                          | Ref.                    | 155 (28.23) | Ref.                     | 0.06±1.05                          | Ref.                    | 66 (11.98)  | Ref.                     |
| Postgraduates             | -0.02±0.82                          | -0.14 (-0.39, 0.12)     | 36 (30.00)  | 0.83 (0.44, 1.54)        | 0.01±0.90                          | -0.09 (-0.36, 0.18)     | 11 (8.80)   | 0.60 (0.23, 1.51)        |
| Residents                 | -0.10±0.84                          | -0.16 (-0.35, 0.04)     | 51 (25.89)  | 0.73 (0.45, 1.16)        | -0.06±0.86                         | -0.15 (-0.35, 0.06)     | 19 (9.64)   | 0.70 (0.35, 1.37)        |
| <b>Nursing</b>            |                                     |                         |             |                          |                                    |                         |             |                          |
| <i>By training stage</i>  |                                     |                         |             |                          |                                    |                         |             |                          |
| Undergraduates            | -0.10±0.90                          | Ref.                    | 75 (29.88)  | Ref.                     | 0.05±1.05                          | Ref.                    | 32 (12.75)  | Ref.                     |
| Postgraduates             | -0.02±0.96                          | 0.05 (-0.30, 0.40)      | 21 (29.58)  | 0.90 (0.35, 2.23)        | 0.04±0.88                          | -0.08 (-0.46, 0.30)     | 8 (10.67)   | 0.69 (0.17, 2.42)        |
| Residents                 | -0.39±0.67                          | -0.31 (-0.51, -0.11)    | 20 (13.33)  | 0.35 (0.19, 0.63)        | -0.36±0.73                         | -0.43 (-0.66, -0.21)    | 11 (7.33)   | 0.49 (0.21, 1.08)        |

a. In this analysis, 462 (11.04%) individuals who missed the measure of psychological distress were not included.

b. In this analysis, 433 (10.35%) individuals who missed the measure of acute stress reaction were not included.

c. Estimates were adjusted for age and sex.

Table 3 Psychological distress and Acute stress reaction among health professional trainees with and without active clinical duty.

|                             | Psychological distress <sup>a</sup> |                         |             |                          | Acute stress reaction <sup>b</sup> |                         |             |                          |
|-----------------------------|-------------------------------------|-------------------------|-------------|--------------------------|------------------------------------|-------------------------|-------------|--------------------------|
|                             | Symptoms                            |                         | Cases       |                          | Symptoms                           |                         | Cases       |                          |
|                             | Mean±SD                             | β (95% CI) <sup>c</sup> | N (%)       | OR (95% CI) <sup>c</sup> | Mean±SD                            | β (95% CI) <sup>c</sup> | N (%)       | OR (95% CI) <sup>c</sup> |
| <b>Active clinical duty</b> |                                     |                         |             |                          |                                    |                         |             |                          |
| No                          | -0.03±0.99                          | Ref.                    | 882 (29.73) | Ref.                     | 0.02±1.02                          | Ref.                    | 326 (10.84) | Ref.                     |
| Yes                         | 0.12±1.02                           | 0.15 (0.07, 0.24)       | 268 (35.50) | 1.31 (1.10, 1.57)        | -0.07±0.92                         | -0.08 (-0.17, 0.00)     | 77 (10.36)  | 0.96 (0.73, 1.26)        |
| <b>By training program</b>  |                                     |                         |             |                          |                                    |                         |             |                          |
| Medicine                    |                                     |                         |             |                          |                                    |                         |             |                          |
| No duty                     | -0.00±1.02                          | Ref.                    | 609 (30.53) | Ref.                     | 0.01±1.02                          | Ref.                    | 212 (10.47) | Ref.                     |
| With duty                   | 0.39±1.10                           | 0.37 (0.26, 0.49)       | 183 (47.04) | 1.92 (1.53, 2.40)        | -0.00±0.98                         | -0.001 (-0.12, 0.11)    | 44 (11.67)  | 1.14 (0.79, 1.60)        |
| Medical technology          |                                     |                         |             |                          |                                    |                         |             |                          |
| No duty                     | -0.08±0.94                          | Ref.                    | 184 (27.84) | Ref.                     | 0.04±1.02                          | Ref.                    | 76 (11.38)  | Ref.                     |
| With duty                   | -0.06±0.86                          | -0.04 (-0.20, 0.12)     | 58 (28.29)  | 0.94 (0.64, 1.38)        | -0.03±0.88                         | -0.08 (-0.25, 0.09)     | 20 (9.76)   | 0.87 (0.49, 1.53)        |
| Nursing                     |                                     |                         |             |                          |                                    |                         |             |                          |
| No duty                     | -0.10±0.90                          | Ref.                    | 89 (28.62)  | Ref.                     | 0.03±1.01                          | Ref.                    | 38 (12.06)  | Ref.                     |
| With duty                   | -0.33±0.75                          | -0.24 (-0.41, -0.07)    | 27 (16.77)  | 0.49 (0.29, 0.80)        | -0.30±0.78                         | -0.34 (-0.53, -0.15)    | 13 (8.07)   | 0.62 (0.30, 1.21)        |
| <b>By training stage</b>    |                                     |                         |             |                          |                                    |                         |             |                          |
| Undergraduates              |                                     |                         |             |                          |                                    |                         |             |                          |
| No duty                     | -0.10±0.96                          | Ref.                    | 442 (26.98) | Ref.                     | 0.02±1.05                          | Ref.                    | 181 (10.96) | Ref.                     |
| With duty                   | 0.54±1.18                           | 0.62 (0.17, 1.08)       | 11 (61.11)  | 4.24 (1.62, 11.80)       | -0.05±1.16                         | 0.01 (-0.48, 0.51)      | 3 (16.67)   | 1.75 (0.39, 5.59)        |
| Postgraduates               |                                     |                         |             |                          |                                    |                         |             |                          |
| No duty                     | 0.06±1.02                           | Ref.                    | 440 (33.11) | Ref.                     | 0.01±0.97                          | Ref.                    | 145 (10.69) | Ref.                     |
| With duty                   | 0.52±1.14                           | 0.47 (0.34, 0.61)       | 146 (51.59) | 2.21 (1.69, 2.87)        | 0.06±1.03                          | 0.07 (-0.06, 0.20)      | 37 (13.50)  | 1.32 (0.88, 1.93)        |
| Residents                   |                                     |                         |             |                          |                                    |                         |             |                          |
| No duty                     | -                                   | Ref.                    | -           | Ref.                     | -                                  | Ref.                    | -           | Ref.                     |
| With duty                   | -0.15±0.82                          | -                       | 111 (24.45) | -                        | -0.16±0.82                         | -                       | 37 (8.20)   | -                        |

a. In this analysis, 462 (11.04%) individuals who missed the measure of psychological distress were not included.

b. In this analysis, 433 (10.35%) individuals who missed the measure of acute stress reaction were not included.

c. Estimates were adjusted for age, sex, and training programs.

Table 4. Associations of concerns and needs during COVID-19 outbreaks with psychological distress and Acute stress reaction among health professional trainees without active clinical duty.

|                                                                 | Psychological distress <sup>a</sup> |             |                          | Acute stress reaction <sup>b</sup> |             |                          |
|-----------------------------------------------------------------|-------------------------------------|-------------|--------------------------|------------------------------------|-------------|--------------------------|
|                                                                 | No (n=2085)                         | Yes (n=882) |                          | No (n=2682)                        | Yes (n=326) |                          |
|                                                                 | N (%)                               | N (%)       | OR (95% CI) <sup>c</sup> | N (%)                              | N (%)       | OR (95% CI) <sup>c</sup> |
| <b>Concerns</b>                                                 |                                     |             |                          |                                    |             |                          |
| Being infected with novel coronavirus                           | 1298 (62.25)                        | 644 (73.02) | 1.42 (1.09, 1.60)        | 1713 (63.87)                       | 256 (78.53) | 1.42 (1.05, 1.95)        |
| Physical health condition                                       | 458 (21.97)                         | 316 (35.83) | 1.32 (1.16, 1.73)        | 630 (23.49)                        | 154 (47.24) | 1.80 (1.37, 2.38)        |
| Psychological health                                            | 189 (9.06)                          | 215 (24.38) | 2.41 (1.91, 3.05)        | 294 (10.69)                        | 120 (36.81) | 3.26 (2.44, 4.33)        |
| Academic performance                                            | 1195 (57.31)                        | 609 (69.05) | 1.30 (1.09, 1.56)        | 1606 (59.88)                       | 220 (67.48) | 0.99 (0.75, 1.29)        |
| Social life/work                                                | 383 (18.37)                         | 212 (24.04) | 1.19 (0.95, 1.48)        | 505 (18.83)                        | 99 (30.37)  | 1.37 (1.01, 1.86)        |
| Traveling plan                                                  | 141 (6.76)                          | 102 (11.56) | 1.36 (1.01, 1.82)        | 201 (7.49)                         | 46 (14.11)  | 1.21 (0.81, 1.78)        |
| Family members or friends being infected with novel coronavirus | 1297 (62.21)                        | 599 (67.91) | 0.94 (0.78, 1.13)        | 1688 (62.94)                       | 231 (70.86) | 0.91 (0.69, 1.21)        |
| Personal or family financial situations                         | 249 (11.94)                         | 171 (19.39) | 1.28 (1.01, 1.62)        | 353 (13.16)                        | 75 (23.01)  | 1.18 (0.85, 1.61)        |
| <b>Needs</b>                                                    |                                     |             |                          |                                    |             |                          |
| Personal protective equipment                                   | 1907 (91.46)                        | 837 (94.90) | 1.50 (1.07, 2.15)        | 2485 (92.65)                       | 299 (91.72) | 0.73 (0.48, 1.17)        |
| Social insurance                                                | 1819 (87.24)                        | 808 (91.61) | 1.32 (0.99, 1.77)        | 2371 (88.40)                       | 292 (89.57) | 0.88 (0.59, 1.35)        |
| Salary incentives                                               | 1386 (66.47)                        | 646 (73.24) | 1.37 (1.13, 1.67)        | 1809 (67.45)                       | 254 (77.91) | 1.79 (1.33, 2.44)        |
| Clinical practice guidance                                      | 1317 (63.17)                        | 549 (62.34) | 0.89 (0.74, 1.08)        | 1672 (62.34)                       | 219 (67.18) | 1.13 (0.85, 1.51)        |
| Professional track record                                       | 1213 (58.18)                        | 516 (58.50) | 0.91 (0.75, 1.11)        | 1551 (57.83)                       | 199 (61.04) | 0.92 (0.69, 1.23)        |
| <b>Future career choice</b>                                     |                                     |             |                          |                                    |             |                          |
| Healthcare worker                                               | 1256 (60.24)                        | 446 (50.57) | Ref.                     | 1587 (59.17)                       | 140 (42.94) | Ref.                     |
| Medicine-related, but not bedside                               | 618 (29.64)                         | 271 (30.73) | 1.26 (1.05, 1.52)        | 791 (29.49)                        | 109 (33.44) | 1.54 (1.17, 2.03)        |
| Outside of medicine                                             | 36 (1.73)                           | 35 (3.97)   | 2.91 (1.79, 4.73)        | 51 (1.90)                          | 19 (5.83)   | 4.17 (2.33, 7.21)        |
| Indeterminate                                                   | 175 (8.39)                          | 130 (14.74) | 2.13 (1.65, 2.75)        | 253 (9.43)                         | 58 (17.79)  | 2.58 (1.83, 3.59)        |

- 1
- 2
- 3
- 4 a. In this analysis, 389 (11.59%) individuals who missed the measure of psychological distress were not included.
- 5 b. In this analysis, 348 (10.37%) individuals who missed the measure of acute stress reaction were not included.
- 6 c. Estimates were adjusted for age, sex, training programs, and training stage
- 7
- 8
- 9
- 10
- 11
- 12
- 13
- 14
- 15
- 16
- 17
- 18
- 19
- 20
- 21
- 22
- 23
- 24
- 25
- 26
- 27
- 28
- 29
- 30
- 31
- 32
- 33
- 34
- 35
- 36
- 37
- 38
- 39
- 40
- 41
- 42
- 43
- 44
- 45
- 46

For peer review only

Table 5 Associations of family-work conflicts during COVID-19 outbreak with psychological distress and Acute stress reaction among health professional trainees with active clinical duty.

|                                                 | Psychological distress <sup>b</sup> |             |                          | Acute stress reaction <sup>a</sup> |             |                          |
|-------------------------------------------------|-------------------------------------|-------------|--------------------------|------------------------------------|-------------|--------------------------|
|                                                 | No (n=487)                          | Yes (n=268) |                          | No (n=666)                         | Yes (n=77)  |                          |
|                                                 | N (%)                               | N (%)       | OR (95% CI) <sup>c</sup> | N (%)                              | N (%)       | OR (95% CI) <sup>c</sup> |
| <b>Work-family conflict</b>                     |                                     |             |                          |                                    |             |                          |
| <b>Difficult to care for family due to work</b> |                                     |             |                          |                                    |             |                          |
| Agree                                           | 122 (18.32)                         | 28 (36.36)  | 2.59 (1.72, 3.91)        | 59 (12.11)                         | 93 (34.70)  | 1.85 (1.07, 3.16)        |
| Neutral                                         | 331 (49.70)                         | 42 (54.55)  | Ref.                     | 249 (5.13)                         | 135 (50.37) | Ref.                     |
| Disagree                                        | 213 (31.98)                         | 7 (9.09)    | 0.46 (0.30, 0.69)        | 179 (36.76)                        | 40 (14.93)  | 0.25 (0.10, 0.54)        |
| <b>Family responsibilities affected work</b>    |                                     |             |                          |                                    |             |                          |
| Agree                                           | 37 (5.56)                           | 14 (18.18)  | 2.03 (1.08, 3.91)        | 19 (3.90)                          | 33 (12.31)  | 2.30 (1.11, 4.60)        |
| Neutral                                         | 265 (39.79)                         | 44 (57.14)  | Ref.                     | 172 (35.32)                        | 145 (54.10) | Ref.                     |
| Disagree                                        | 364 (54.65)                         | 19 (24.88)  | 0.39 (0.28, 0.55)        | 296 (60.78)                        | 90 (33.58)  | 0.31 (0.17, 0.55)        |
| <b>Difficulties in juggling work and family</b> |                                     |             |                          |                                    |             |                          |
| Agree                                           | 36 (5.41)                           | 14 (18.18)  | 2.77 (1.41, 5.70)        | 14 (2.87)                          | 37 (13.81)  | 2.54 (1.20, 5.25)        |
| Neutral                                         | 246 (36.94)                         | 43 (55.84)  | Ref.                     | 155 (31.83)                        | 140 (52.24) | Ref.                     |
| Disagree                                        | 384 (57.66)                         | 20 (25.97)  | 0.37 (0.26, 0.52)        | 318 (65.30)                        | 91 (33.96)  | 0.28 (0.16, 0.50)        |
| <b>Social support</b>                           |                                     |             |                          |                                    |             |                          |
| <b>Support from family</b>                      |                                     |             |                          |                                    |             |                          |
| Agree                                           | 466 (69.97)                         | 35 (45.45)  | 0.48 (0.33, 0.68)        | 359 (73.72)                        | 148 (55.22) | 0.41 (0.25, 0.70)        |
| Neutral                                         | 166 (24.92)                         | 31 (40.26)  | Ref.                     | 107 (21.97)                        | 95 (35.45)  | Ref.                     |
| Disagree                                        | 34 (5.11)                           | 11 (14.29)  | 1.19 (0.60, 2.37)        | 21 (4.31)                          | 25 (9.33)   | 1.64 (0.72, 3.54)        |
| <b>Support from colleagues</b>                  |                                     |             |                          |                                    |             |                          |
| Agree                                           | 545 (81.83)                         | 44 (57.14)  | 0.40 (0.27, 0.60)        | 414 (85.01)                        | 181 (67.54) | 0.31 (0.18, 0.53)        |
| Neutral                                         | 110 (16.52)                         | 30 (38.96)  | Ref.                     | 65 (13.35)                         | 81 (30.22)  | Ref.                     |

|                                                     | Psychological distress <sup>b</sup> |             |                   | Acute stress reaction <sup>a</sup> |             |                   |
|-----------------------------------------------------|-------------------------------------|-------------|-------------------|------------------------------------|-------------|-------------------|
|                                                     | No (n=487)                          | Yes (n=268) |                   | No (n=666)                         | Yes (n=77)  |                   |
| Disagree                                            | 11 (1.65)                           | 3 (3.90)    | 0.50 (0.15, 1.62) | 8 (1.64)                           | 6 (2.24)    | 0.99 (0.21, 3.48) |
| <b>Support from supervisors</b>                     |                                     |             |                   |                                    |             |                   |
| Agree                                               | 505 (75.83)                         | 30 (38.96)  | 0.41 (0.28, 0.58) | 389 (79.98)                        | 150 (55.97) | 0.21 (0.12, 0.37) |
| Neutral                                             | 146 (21.92)                         | 39 (50.65)  | Ref.              | 87 (17.86)                         | 105 (39.18) | Ref.              |
| Disagree                                            | 15 (2.25)                           | 8 (10.39)   | 0.84 (0.35, 2.08) | 11 (2.26)                          | 13 (4.85)   | 2.22 (0.82, 5.72) |
| <b>Policy support</b>                               |                                     |             |                   |                                    |             |                   |
| <b>Reasonable holiday arrangement</b>               |                                     |             |                   |                                    |             |                   |
| Agree                                               | 463 (69.52)                         | 28 (36.36)  | 0.41 (0.28, 0.60) | 369 (75.77)                        | 126 (47.01) | 0.26 (0.15, 0.46) |
| Neutral                                             | 156 (23.42)                         | 34 (44.16)  | Ref.              | 94 (19.30)                         | 102 (38.06) | Ref.              |
| Disagree                                            | 47 (7.06)                           | 15 (19.48)  | 1.34 (0.73, 2.47) | 24 (4.93)                          | 40 (14.93)  | 1.44 (0.69, 2.91) |
| <b>Reasonable duty arrangement</b>                  |                                     |             |                   |                                    |             |                   |
| Agree                                               | 468 (70.27)                         | 29 (37.66)  | 0.43 (0.30, 0.63) | 371 (76.18)                        | 129 (48.13) | 0.26 (0.15, 0.45) |
| Neutral                                             | 163 (24.47)                         | 37 (48.05)  | Ref.              | 100 (20.53)                        | 106 (39.55) | Ref.              |
| Disagree                                            | 35 (5.26)                           | 11 (14.29)  | 1.70 (0.87, 3.41) | 16 (3.29)                          | 33 (12.31)  | 1.28 (0.57, 2.74) |
| <b>Flexible policies to balance family and work</b> |                                     |             |                   |                                    |             |                   |
| Agree                                               | 438 (65.77)                         | 25 (32.47)  | 0.38 (0.27, 0.55) | 356 (73.10)                        | 109 (40.67) | 0.28 (0.16, 0.51) |
| Neutral                                             | 200 (30.03)                         | 36 (46.75)  | Ref.              | 120 (24.64)                        | 123 (45.90) | Ref.              |
| Disagree                                            | 28 (4.20)                           | 16 (20.78)  | 3.14 (1.54, 6.84) | 11 (2.26)                          | 36 (13.43)  | 3.35 (1.60, 6.90) |

a. In this analysis, 85 (10.27%) individuals who missed the measure of psychological distress were not included.

b. In this analysis, 73 (8.82%) individuals who missed the measure of acute stress reaction were not included.

c. Adjusted for age, sex, training programs, and training stages.

Figure 1 Research Flow Chart

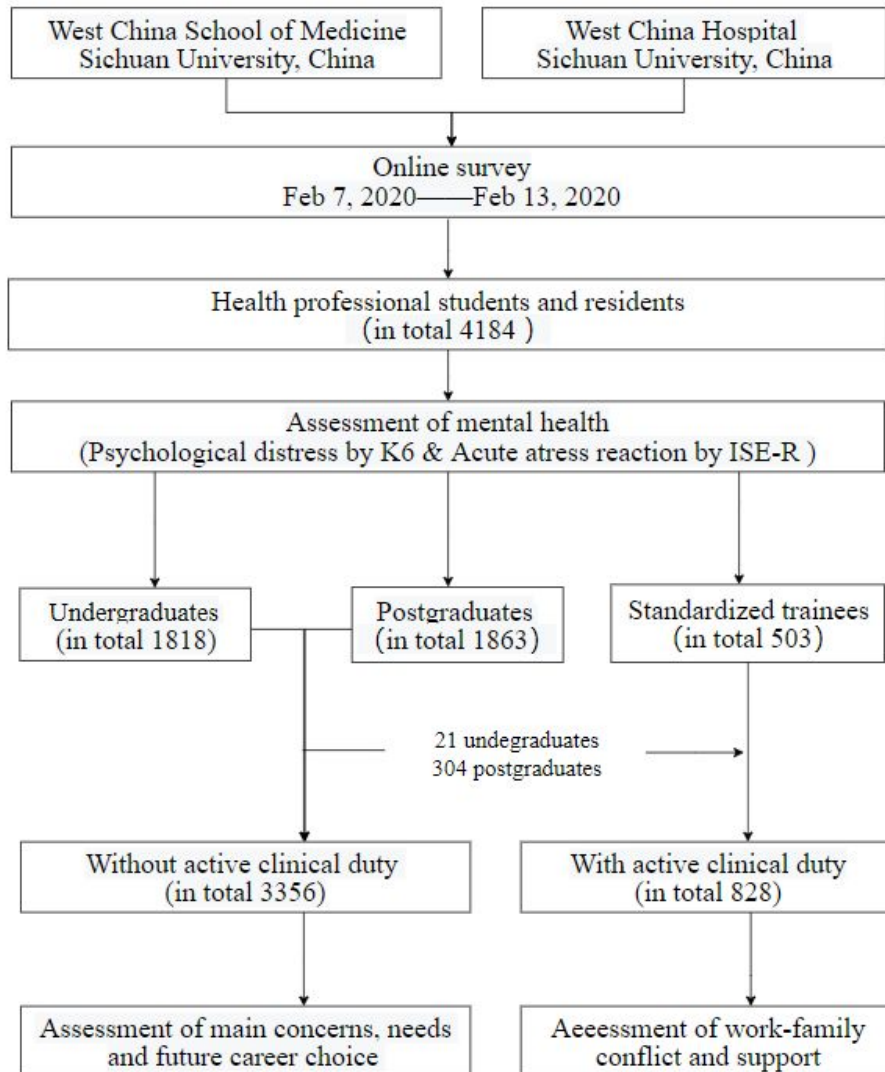

STROBE Statement—Checklist of items that should be included in reports of *cross-sectional studies*

|                              | Item No | Recommendation                                                                                                                                                                                    | Page No        |
|------------------------------|---------|---------------------------------------------------------------------------------------------------------------------------------------------------------------------------------------------------|----------------|
| <b>Title and abstract</b>    | 1       | (a) Indicate the study's design with a commonly used term in the title or the abstract                                                                                                            | 1              |
|                              |         | (b) Provide in the abstract an informative and balanced summary of what was done and what was found                                                                                               | 3              |
| <b>Introduction</b>          |         |                                                                                                                                                                                                   |                |
| Background/rationale         | 2       | Explain the scientific background and rationale for the investigation being reported                                                                                                              | 6              |
| Objectives                   | 3       | State specific objectives, including any prespecified hypotheses                                                                                                                                  | 6              |
| <b>Methods</b>               |         |                                                                                                                                                                                                   |                |
| Study design                 | 4       | Present key elements of study design early in the paper                                                                                                                                           | 6              |
| Setting                      | 5       | Describe the setting, locations, and relevant dates, including periods of recruitment, exposure, follow-up, and data collection                                                                   | 6-7            |
| Participants                 | 6       | (a) Give the eligibility criteria, and the sources and methods of selection of participants                                                                                                       | 7              |
| Variables                    | 7       | Clearly define all outcomes, exposures, predictors, potential confounders, and effect modifiers. Give diagnostic criteria, if applicable                                                          | 8-10           |
| Data sources/<br>measurement | 8*      | For each variable of interest, give sources of data and details of methods of assessment (measurement). Describe comparability of assessment methods if there is more than one group              | 8-10           |
| Bias                         | 9       | Describe any efforts to address potential sources of bias                                                                                                                                         | 15             |
| Study size                   | 10      | Explain how the study size was arrived at                                                                                                                                                         | 7              |
| Quantitative variables       | 11      | Explain how quantitative variables were handled in the analyses. If applicable, describe which groupings were chosen and why                                                                      | 8-10           |
| Statistical methods          | 12      | (a) Describe all statistical methods, including those used to control for confounding                                                                                                             | 10             |
|                              |         | (b) Describe any methods used to examine subgroups and interactions                                                                                                                               | Not applicable |
|                              |         | (c) Explain how missing data were addressed                                                                                                                                                       | 20-26          |
|                              |         | (d) If applicable, describe analytical methods taking account of sampling strategy                                                                                                                | Not applicable |
|                              |         | (e) Describe any sensitivity analyses                                                                                                                                                             | Not applicable |
| <b>Results</b>               |         |                                                                                                                                                                                                   |                |
| Participants                 | 13*     | (a) Report numbers of individuals at each stage of study—eg numbers potentially eligible, examined for eligibility, confirmed eligible, included in the study, completing follow-up, and analysed | Supplementary  |
|                              |         | (b) Give reasons for non-participation at each stage                                                                                                                                              | Not applicable |
|                              |         | (c) Consider use of a flow diagram                                                                                                                                                                | Supplementary  |
| Descriptive data             | 14*     | (a) Give characteristics of study participants (eg demographic, clinical, social) and information on exposures and potential confounders                                                          | 10-11,20       |
|                              |         | (b) Indicate number of participants with missing data for each variable of interest                                                                                                               | 20-26          |



|                          |     |                                                                                                                                                                                                              |                |
|--------------------------|-----|--------------------------------------------------------------------------------------------------------------------------------------------------------------------------------------------------------------|----------------|
| Outcome data             | 15* | Report numbers of outcome events or summary measures                                                                                                                                                         | 10-11          |
| Main results             | 16  | (a) Give unadjusted estimates and, if applicable, confounder-adjusted estimates and their precision (eg, 95% confidence interval). Make clear which confounders were adjusted for and why they were included | 20-26          |
|                          |     | (b) Report category boundaries when continuous variables were categorized                                                                                                                                    | 8-9            |
|                          |     | (c) If relevant, consider translating estimates of relative risk into absolute risk for a meaningful time period                                                                                             | Not applicable |
| Other analyses           | 17  | Report other analyses done—eg analyses of subgroups and interactions, and sensitivity analyses                                                                                                               | Not applicable |
| <b>Discussion</b>        |     |                                                                                                                                                                                                              |                |
| Key results              | 18  | Summarise key results with reference to study objectives                                                                                                                                                     | 12             |
| Limitations              | 19  | Discuss limitations of the study, taking into account sources of potential bias or imprecision. Discuss both direction and magnitude of any potential bias                                                   | 15             |
| Interpretation           | 20  | Give a cautious overall interpretation of results considering objectives, limitations, multiplicity of analyses, results from similar studies, and other relevant evidence                                   | 13-15          |
| Generalisability         | 21  | Discuss the generalisability (external validity) of the study results                                                                                                                                        | 15             |
| <b>Other information</b> |     |                                                                                                                                                                                                              |                |
| Funding                  | 22  | Give the source of funding and the role of the funders for the present study and, if applicable, for the original study on which the present article is based                                                | 16-17          |

\*Give information separately for exposed and unexposed groups.

**Note:** An Explanation and Elaboration article discusses each checklist item and gives methodological background and published examples of transparent reporting. The STROBE checklist is best used in conjunction with this article (freely available on the Web sites of PLoS Medicine at <http://www.plosmedicine.org/>, Annals of Internal Medicine at <http://www.annals.org/>, and Epidemiology at <http://www.epidem.com/>). Information on the STROBE Initiative is available at [www.strobe-statement.org](http://www.strobe-statement.org).

# BMJ Open

## COVID-19 outbreak-related psychological distress among healthcare trainees: a cross-sectional study in China

|                                 |                                                                                                                                                                                                                                                                                                                                                                                                                                                                                                                                                                                                                                                                               |
|---------------------------------|-------------------------------------------------------------------------------------------------------------------------------------------------------------------------------------------------------------------------------------------------------------------------------------------------------------------------------------------------------------------------------------------------------------------------------------------------------------------------------------------------------------------------------------------------------------------------------------------------------------------------------------------------------------------------------|
| Journal:                        | <i>BMJ Open</i>                                                                                                                                                                                                                                                                                                                                                                                                                                                                                                                                                                                                                                                               |
| Manuscript ID                   | bmjopen-2020-041671.R1                                                                                                                                                                                                                                                                                                                                                                                                                                                                                                                                                                                                                                                        |
| Article Type:                   | Original research                                                                                                                                                                                                                                                                                                                                                                                                                                                                                                                                                                                                                                                             |
| Date Submitted by the Author:   | 01-Sep-2020                                                                                                                                                                                                                                                                                                                                                                                                                                                                                                                                                                                                                                                                   |
| Complete List of Authors:       | Wang, Yue; Sichuan University, Mental health center<br>Li, Yuchen; Sichuan University, Mental health center; Karolinska Institute, Department of Medical Epidemiology and Biostatistics<br>Jiang, Jingwen; Sichuan University, West China Biomedical Big Data Center<br>Feng, Yuying; Sichuan University, Student Affairs Office<br>Song, Huan; Sichuan University, West China Biomedical Big Data Center; University of Iceland, Center of Public Health Sciences<br>Zhang, Wei; Sichuan University,<br>Lu, Donghao ; Karolinska Institutet Department of Medical Epidemiology and Biostatistics; Karolinska Institute, Department of Medical Epidemiology and Biostatistics |
| <b>Primary Subject Heading</b>: | Mental health                                                                                                                                                                                                                                                                                                                                                                                                                                                                                                                                                                                                                                                                 |
| Secondary Subject Heading:      | Epidemiology, Medical education and training                                                                                                                                                                                                                                                                                                                                                                                                                                                                                                                                                                                                                                  |
| Keywords:                       | PSYCHIATRY, MENTAL HEALTH, MEDICAL EDUCATION & TRAINING, EPIDEMIOLOGY, COVID-19                                                                                                                                                                                                                                                                                                                                                                                                                                                                                                                                                                                               |
|                                 |                                                                                                                                                                                                                                                                                                                                                                                                                                                                                                                                                                                                                                                                               |

SCHOLARONE™  
Manuscripts



I, the Submitting Author has the right to grant and does grant on behalf of all authors of the Work (as defined in the below author licence), an exclusive licence and/or a non-exclusive licence for contributions from authors who are: i) UK Crown employees; ii) where BMJ has agreed a CC-BY licence shall apply, and/or iii) in accordance with the terms applicable for US Federal Government officers or employees acting as part of their official duties; on a worldwide, perpetual, irrevocable, royalty-free basis to BMJ Publishing Group Ltd ("BMJ") its licensees and where the relevant Journal is co-owned by BMJ to the co-owners of the Journal, to publish the Work in this journal and any other BMJ products and to exploit all rights, as set out in our [licence](#).

The Submitting Author accepts and understands that any supply made under these terms is made by BMJ to the Submitting Author unless you are acting as an employee on behalf of your employer or a postgraduate student of an affiliated institution which is paying any applicable article publishing charge ("APC") for Open Access articles. Where the Submitting Author wishes to make the Work available on an Open Access basis (and intends to pay the relevant APC), the terms of reuse of such Open Access shall be governed by a Creative Commons licence – details of these licences and which [Creative Commons](#) licence will apply to this Work are set out in our licence referred to above.

Other than as permitted in any relevant BMJ Author's Self Archiving Policies, I confirm this Work has not been accepted for publication elsewhere, is not being considered for publication elsewhere and does not duplicate material already published. I confirm all authors consent to publication of this Work and authorise the granting of this licence.

1  
2  
3 1 **COVID-19 outbreak-related psychological distress among healthcare trainees: a cross-**  
4 **sectional study in China**  
5  
6  
7  
8  
9

10 4 Yue Wang<sup>1#</sup>; Yuchen Li<sup>1,2#</sup>; Jingwen Jiang<sup>3</sup>; Yuying Feng<sup>4</sup>; Huan Song<sup>3,5\*</sup>; Wei Zhang<sup>1,3\*</sup>;  
11  
12 5 Donghao Lu<sup>2,6,7,8</sup>  
13  
14  
15  
16

17 7 **Authors' institutions**

18  
19 8 1. Mental Health Center, West China Hospital of Sichuan University, Chengdu, China;

20  
21 9 2. Department of Medical Epidemiology and Biostatistics, Karolinska Institute, Stockholm,  
22  
23 10 Sweden;

24  
25 11 3. West China Biomedical Big Data Center, West China Hospital, Sichuan University,  
26  
27 12 Chengdu, China;

28  
29 13 4. Student Affairs Office, West China School of Medicine, Sichuan University, Chengdu,  
30  
31 14 China;

32  
33 15 5. Center of Public Health Sciences, Faculty of Medicine, University of Iceland, Reykjavík,  
34  
35 16 Iceland;

36  
37 17 6. Department of Epidemiology, Harvard T.H. Chan School of Public Health, Boston,  
38  
39 18 Massachusetts;

40  
41 19 7. Channing Division of Network Medicine, Brigham and Women's Hospital, Harvard  
42  
43 20 Medical School, Boston, Massachusetts;

44  
45 21 8. Clinical Research Center for Breast Diseases, West China Hospital, Sichuan University,  
46  
47 22 Chengdu, China;

48  
49 23 # Yue Wang and Yuchen Li contribute equally to the study.

50  
51 24 \* Huan Song, and Wei Zhang contribute equally to the study.  
52  
53  
54  
55  
56  
57  
58  
59  
60

1  
2  
3 1 **Correspondence:** Huan Song, MD, PhD, West China Biomedical Big Data Center, West  
4  
5 2 China Hospital, Sichuan University, Guoxue Lane 37, Chengdu, China (e-mail:  
6  
7 3 [songhuan@wchscu.cn](mailto:songhuan@wchscu.cn)); or Wei Zhang, MD, West China Biomedical Big Data Center, West  
8  
9 4 China Hospital, Sichuan University, Guoxue Lane 37, Chengdu, China (e-mail:  
10  
11 5 [weizhanghx@163.com](mailto:weizhanghx@163.com)).  
12  
13  
14  
15  
16  
17  
18  
19  
20  
21  
22  
23  
24  
25  
26  
27  
28  
29  
30  
31  
32  
33  
34  
35  
36  
37  
38  
39  
40  
41  
42  
43  
44  
45  
46  
47  
48  
49  
50  
51  
52  
53  
54  
55  
56  
57  
58  
59  
60

For peer review only

## 1 **Abstract**

2 **Objectives** The COVID-19 outbreak has caused enormous strain on healthcare systems, and  
3 healthcare trainees, which comprise the future healthcare workforce, may be a vulnerable  
4 group. It is essential to assess the psychological distress experienced by healthcare trainees  
5 during the COVID-19 outbreak.

6 **Design, setting, and participants** A cross-sectional study with 4184 healthcare trainees at  
7 Sichuan University in China was implemented during February 7-13, 2020. Participants were  
8 grouped by training program (medicine, medical technology, and nursing) and training stages  
9 (undergraduate, postgraduate, and residency).

10 **Main outcomes** COVID-19-related psychological distress and acute stress reaction (ASR)  
11 were assessed using the Kessler 6-item Psychological Distress Scale and the Impact of Event  
12 Scale-Revised, respectively. We estimated the odds ratios (ORs) of distress by comparing  
13 trainees across programs and training stages using multivariable logistic regression.

14 **Results** Significant psychological distress was found in 1150 (30.90%) participants and  
15 probable ASR in 403 (10.74%). Compared to the nursing trainees, the medical trainees (OR  
16 1.54, 95% CI 1.22 - 1.95) reported a higher burden of psychological distress during the  
17 outbreak, whilst the medical technology trainees (OR 1.25, 95%CI 0.97 - 1.62) reported  
18 similar symptom scores. Postgraduates (OR 1.55, 95%CI 1.16 - 2.08) in medicine had higher  
19 levels of distress than their undergraduate counterparts did, whereas the nursing residents  
20 (OR 0.38, 95%CI 0.20 - 0.71) reported a lower burden than did nursing undergraduates. A  
21 positive association was found between having active clinical duties during the outbreak and  
22 distress (OR 1.17, 95%CI 0.98 - 1.39), particularly among the medical trainees (OR 1.85,  
23 95%CI 1.47 - 2.33) and undergraduates (OR 4.20, 95%CI 1.61 - 11.70). No clear risk patterns  
24 of ASR symptoms were observed.

25 **Conclusions** Medical trainees, particularly postgraduates and those with active clinical

1  
2  
3  
4  
5  
6  
7  
8  
9  
10  
11  
12  
13  
14  
15  
16  
17  
18  
19  
20  
21  
22  
23  
24  
25  
26  
27  
28  
29  
30  
31  
32  
33  
34  
35  
36  
37  
38  
39  
40  
41  
42  
43  
44  
45  
46  
47  
48  
49  
50  
51  
52  
53  
54  
55  
56  
57  
58  
59  
60

- 1 duties, were at risk for psychological distress during the COVID-19 outbreak. Stress
- 2 management may be considered for high-risk healthcare trainees.

For peer review only

1  
2  
3 **1 Strengths and limitations of this study**  
4

- 5 2 ● We assessed psychological distress among healthcare trainees across different programs  
6  
7 and training stages during the COVID-19 outbreak.  
8  
9  
10 4 ● To shed light on the pandemic's impact on trainees' lives and work, we assessed their  
11  
12 concerns and needs during the outbreak and their influence on the future career choices of  
13  
14 the trainees without active clinical duties; we also evaluated work-family conflict and  
15  
16 support among trainees with clinical duties.  
17  
18 8 ● Our analyses were limited by the study's cross-sectional design, its setting in a single  
19  
20 medical school and teaching hospital; hence, the results should be interpreted in light of  
21  
22 these limitations and the survey's constraints.  
23  
24  
25  
26  
27  
28  
29  
30  
31  
32  
33  
34  
35  
36  
37  
38  
39  
40  
41  
42  
43  
44  
45  
46  
47  
48  
49  
50  
51  
52  
53  
54  
55  
56  
57  
58  
59  
60



## 1 **Introduction**

2 The ongoing global pandemic of the 2019 novel coronavirus disease (COVID-19) has caused  
3 1,991,562 cases and 130,885 deaths as of April 16th, 2020<sup>1</sup>. Witnessing an unexpected illness  
4 or death, fear of being in direct contact with and infected by patients with COVID-19, and  
5 dealing with household financial hardships during the outbreak has increased the mental  
6 burden in the general population<sup>2</sup>. These factors have also elevated the mental burden of  
7 healthcare trainees and workers<sup>3-5</sup>, with frontline workers having heavy workloads and being  
8 placed at higher risk for COVID-19, due to the drastic surge in patients with COVID-19.  
9 Emerging data indicate that Chinese healthcare workers exposed to COVID-19 have  
10 experienced psychological symptoms, especially women, nurses, those in Wuhan (the first  
11 epicenter), and frontline workers<sup>6</sup>. Other studies have reported a profound mental impact of  
12 the COVID-19 outbreak on healthcare workers globally<sup>3, 5, 7</sup>.

13  
14 Despite their limited direct contact with patients with COVID-19, healthcare trainees are a  
15 vulnerable group<sup>8</sup>. As the pandemic escalates, many countries are considering, or have  
16 already graduated senior students earlier to assist frontline workers. Other aggressive  
17 approaches have been proposed, for instance, suspending all medical school education for  
18 one year and recruiting medical students for testing, tracking, and quarantining patients with  
19 COVID-19<sup>9</sup>. Although many trainees are inspired during these unprecedented times, some,  
20 especially those without sufficient clinical experience, may experience stress. Nevertheless,  
21 the psychological state of healthcare trainees across various programs and training stages, in  
22 response to the COVID-19 outbreak, is unknown.

## 23 24 **Materials and methods**

### 25 **Study design**

1 We conducted a cross-sectional study of healthcare trainees from the West China School of  
2 Medicine and West China Hospital, Sichuan University during February 7th-13th, 2020. We  
3 invited 7177 individuals, including 2483 undergraduates, 2606 postgraduates, and 2088  
4 residents, to participate in this study to assess their mental health and working conditions  
5 during the COVID-19 outbreak via WeChat, a popular social media application in China. The  
6 4184 trainees who agreed to participate were included in the analyses. For data protection,  
7 answers to these electronic questionnaires were kept anonymously. The response rates for  
8 undergraduates, postgraduates, and residents were 73.22%, 71.49%, and 24.09%, respectively  
9 (Supplementary Figure 1).

11 We focused exclusively on the main concerns and needs of undergraduates and postgraduates  
12 who were not involved in clinical work during the COVID-19 epidemic, and the impact of  
13 their experiences on their future career plans. We also conducted a short survey of clinical  
14 workers about work-family conflict and support during the epidemic. The total number of  
15 participants included 1818 undergraduates, 1863 postgraduates, and 503 residents. This study  
16 was approved by the Ethics Committee of Sichuan University, and electronic consent forms  
17 were obtained from all participants.

19 Most of the undergraduate and postgraduate students were at home throughout the country  
20 during the COVID-19 outbreak due to the Chinese Spring Festival, while all residents  
21 remained in Chengdu, Sichuan Province because of their clinical duties. As of February 6th,  
22 2020, the total number of confirmed COVID-19 cases was 344 in Sichuan Province (102 in  
23 Chengdu), and 7226 individuals were under medical observation<sup>10</sup>.

## 25 **Healthcare programs and training stages**

1  
2  
3 1 Healthcare training programs in China mainly consist of medicine, medical technology, and  
4  
5 2 nursing for the preparation of future doctors, medical technologists (including medical  
6  
7 3 laboratory technologists, imaging technologists, physical therapists, and optometrists.), and  
8  
9 4 nurses to practice in healthcare settings. The training stages in this study were divided into  
10  
11 5 three categories: undergraduate, postgraduate, and residency. All training programs begin  
12  
13 6 during students' enrollment in undergraduate programs; the length of training of medical  
14  
15 7 programs is 5 years, and it is 4 years for medical technology and nursing programs. After  
16  
17 8 graduation, individuals continue training in a postgraduate program (3-6 years) with a  
18  
19 9 primary focus on research, which can be combined with clinical training. Students who  
20  
21 10 pursue careers as clinicians enter a residency program (3 years for medicine and 2 years for  
22  
23 11 medical technology and nursing) for supervised clinical practice after graduation from an  
24  
25 12 undergraduate or postgraduate program.  
26  
27  
28  
29  
30  
31  
32

33 14 Due to the co-occurrence of COVID 19 and the Chinese Spring Festival, individuals in the  
34  
35 15 early stage of training had a low proportion of clinical experiences at the time of the survey.  
36  
37 16 In order to protect students without clinical experience, the medical school canceled clinical  
38  
39 17 practicums for undergraduates after the COVID-19 outbreak, and a few of the senior  
40  
41 18 undergraduates with internship experiences volunteered to remain at the hospital and support  
42  
43 19 its clinical work. The clinically active trainees included 503 residents and 325 students (304  
44  
45 20 postgraduates and 21 undergraduates). To assess the work status of the trainees, we asked all  
46  
47 21 participants in the survey, "Are you actively performing clinical duties at this time?"  
48  
49 22 (Supplementary Supplemental Text).  
50  
51  
52  
53  
54  
55

## 56 24 **Assessment of outbreak-related psychological distress**

57  
58 25 When we assessed psychological distress and acute stress reaction (ASR), we phrased the  
59  
60

1  
2  
3 1 questions so they were specific to the COVID-19 outbreak (Supplementary Supplemental  
4  
5 2 Text).

6  
7  
8 3  
9  
10 4 Psychological distress was assessed using the Chinese version of the Kessler Psychological  
11  
12 5 Distress Scale (K6). The instrument consists of six items pertaining to major depression and  
13  
14 6 generalized anxiety disorder and asks respondents how frequently they have experienced  
15  
16 7 relevant symptoms during the past month<sup>11</sup>. Each item has five options ranging from 0  
17  
18 8 (never) to 4 (all of the time), and the total score ranges from 0 to 24. We considered a score  
19  
20 9  $\geq 5$  as clinically significant distress in accordance with the validation studies on Asian  
21  
22  
23  
24  
25 10 populations<sup>12,13</sup>. The Cronbach's alpha was 0.91 in our study, indicating good scale  
26  
27 11 reliability.

28  
29  
30 12  
31  
32 13 The variable ASR was evaluated using the Chinese version of the Impact of Event Scale-  
33  
34 14 Revised (ISE-R)<sup>14</sup>. The instrument consists of 22 items and yields a total score and scores on  
35  
36 15 the Intrusion, Avoidance, and Hyperarousal subscales. Respondents identify a stressful event  
37  
38 16 and how much they were distressed or bothered during the past seven days by the difficulties  
39  
40 17 listed in the items. Responses are rated on a 5-point scale, ranging from 0 (not at all) to 4  
41  
42 18 (extremely). Individuals with a score  $\geq 24$  points are considered to have probable ASR<sup>15,16</sup>.  
43  
44  
45  
46  
47 19 The Cronbach's  $\alpha$  was 0.91 in our study, suggesting good scale reliability.

## 20 21 **Assessment of the outbreak's impact**

22 To shed light on the impact of the outbreak on trainees' lives and work, we assessed the  
23 concerns and needs of trainees without active clinical duties during the outbreak and the  
24 pandemic's influence on their future career choices. We also evaluated work-family conflict

1 and support among the trainees with clinical duties (Supplementary Supplemental Text).  
2  
3  
4  
5  
6  
7  
8 *Concerns and needs during the outbreak, and their influence on future career choices:* To  
9  
10 understand trainees' main concerns and needs, we asked the following question. "Under the  
11  
12 current circumstances, I am concerned about a) being infected with the novel coronavirus; b)  
13  
14 my physical health condition; c) my psychological health; d) academic performance; e) my  
15  
16 social life and work; f) my traveling plans; g) the risk of infection from family members or  
17  
18 friends; h) my personal and family's financial situation; and i) other issues." We also asked  
19  
20 participants to respond to the following item. "If I were to work during the outbreak, I would  
21  
22 need: a) personal protective equipment; b) social insurance; c) salary incentives; d) clinical  
23  
24 practice guidance; e) professional track record; and f) other needs." Multiple responses were  
25  
26 allowed for these questions. We used one single question: "Has the outbreak affected your  
27  
28 future career plans?" to assess the impact of the COVID-19 outbreak on trainees' future  
29  
30 career plans.  
31  
32  
33  
34  
35  
36  
37  
38  
39  
40  
41  
42  
43  
44  
45  
46  
47  
48

16 *Work-family conflict and support:* The 9-item Chinese version of the Work-Family Conflict  
17  
18 and Support Scale was used to investigate work-family conflict, social support, and policy  
19  
20 support<sup>17</sup>. Each dimension has three items and each item has three options: 1 (agree), 2  
21  
22 (neutral), and 3 (disagree).  
23  
24  
25  
26  
27  
28  
29  
30  
31  
32  
33  
34  
35  
36  
37  
38  
39  
40  
41  
42  
43  
44  
45  
46  
47  
48

## 21 **Statistical Analysis**

22 We compared the baseline characteristics of the trainees across the different programs (i.e.,  
23  
24 medicine, medical technology, and nursing) using Student's *t*-test (for continuous variables)  
25  
26 and the Chi-square test (for categorical variables). We described the distributions of the  
27  
28 symptoms' scores (transformed z-scores are reported as mean standard deviation), and the  
29  
30  
31  
32  
33  
34  
35  
36  
37  
38  
39  
40  
41  
42  
43  
44  
45  
46  
47  
48  
49  
50  
51  
52  
53  
54  
55  
56  
57  
58  
59  
60

1 proportion of identified cases (corresponding to the cut-off points stated in the Methods  
2 section), in each of the three program groups. Differences in symptom scores or the  
3 probability of cases were estimated using linear regression ( $\beta$  coefficients) and logistic  
4 regression (odds ratios, ORs), respectively. We examined the associations of the concerns,  
5 needs, and future career choices with psychological distress and ASR among the participants  
6 without active clinical duties, and the associations of family-work conflict with psychological  
7 distress and ASR in the participants with active clinical duties. All models were adjusted for  
8 age, sex, marital status and epidemic contact characteristics to address confounding by these  
9 variables. We also adjusted the model for training program and training stage when analyzing  
10 the associations of concerns, needs, career impact and family-work conflicts with  
11 psychological distress and ASR. As the status of clinical duty is strongly correlated with  
12 training stage, we didn't adjust for active clinical duty (yes or no) as covariates. Individuals  
13 with missing data on the measures of psychological distress (462, 11.04%) or ASR (433,  
14 10.35%) were not included in the corresponding analyses. We analyzed the data  
15 anonymously, and all analyses were conducted using R 3.6.1;  $p < 0.05$  was considered to be  
16 statistically significant.

## 18 **Patient and public involvement**

19 Patients and/or the public were not involved in the design, or conduct, or reporting, or  
20 dissemination plans of this research.

## 22 **Results**

### 23 **Demographic characteristics**

24 The mean age of the 4184 participants was  $23.41 \pm 3.81$  years and 64.89% were females. No  
25 confirmed cases of COVID-19 were reported, but 31 (0.74%) trainees had at least one

1 relative who was infected. Approximately one-fifth (19.79%) of participants were involved in  
2 active clinical duties; among them, 74 (8.94%) were working on the front lines and 38  
3 (4.59%) had direct contact with patients with COVID-19 (Table 1). Compared with trainees  
4 in the medical technology and nursing programs, the trainees in medicine were older  
5 ( $p<0.01$ ), and more likely to be postgraduates ( $p<0.01$ ), males ( $p<0.01$ ), married ( $p<0.01$ ),  
6 and living outside of Hubei Province, the first epicenter ( $p=0.02$ ). At the time of the survey,  
7 nursing trainees were more likely to have active clinical duties and work on the front lines  
8 ( $p<0.01$ ).

### 10 **Outbreak-related psychological distress and ARS**

11 During the outbreak, 1150 (30.90%) trainees reported significant psychological distress and  
12 403 (10.74%) reported probable ASR. Distress symptoms ( $\beta$  0.24, 95%CI 0.14 - 0.35) and  
13 cases of significant distress (OR 1.54, 95%CI 1.22 - 1.95; Table 2) were positively associated  
14 with being medical trainees, compared to being nursing trainees. A similar pattern was found  
15 among medical technology trainees ( $\beta$  0.13, 95% 0.02 - 0.25; OR 1.25, 95%CI 0.97 - 1.62),  
16 although the association with distress cases was not significant. Compared with  
17 undergraduates, postgraduates (OR 1.55, 95%CI 1.16 - 2.08) in the medical program had  
18 higher levels of distress, whereas nursing residents (OR 0.38, 95%CI 0.20 - 0.71) reported a  
19 lower burden. No significant increase was found across training stages among the medical-  
20 technology trainees. Similar patterns, with weaker associations were observed for symptoms  
21 of ASR and probable distress cases across the training programs and stages within the  
22 programs, except for the lower burden of ASR symptoms reported by the medical residents  
23 compared to the undergraduates.

25 Associations of active clinical duties during the outbreak with distress symptoms ( $\beta$  0.09,

1 95%CI 0.01 - 0.18) and cases of significant distress (OR 1.17, 95%CI 0.98 - 1.39; Table 3)  
2  
3  
4  
5 were found. The association between active duties and distress was positive among the  
6  
7  
8 medical trainees (OR 1.85, 95%CI 1.47 - 2.33), but negative among the nursing trainees (OR  
9  
10 0.55, 95%CI 0.32 - 0.93). The association was slightly stronger among undergraduates (OR  
11  
12 4.20, 95%CI 1.61 - 11.70) than it was among postgraduates (OR 2.23, 95%CI 1.72 - 2.91).  
13  
14 However, active clinical duty was negatively associated with ASR symptoms ( $\beta$  -0.10,  
15  
16 95%CI -0.19 - -0.02), and except for that finding, almost all associations of ASR across  
17  
18 training programs and stages were not significant.  
19  
20  
21  
22  
23

## 24 **Outbreak's impact on vulnerable trainees**

25  
26 Among the trainees without active clinical duties during the outbreak, psychological distress  
27  
28 was significantly associated with concerns about mental health (OR 2.41, 95%CI 1.90 - 3.04;  
29  
30 Table 4) and demands for personal protective equipment (OR 1.51, 95%CI 1.07 - 2.16). They  
31  
32 were more likely to consider future careers outside of medicine (OR 2.89, 95%CI 1.77 -  
33  
34 4.69). A similar pattern was found for ASR, except for concerns about academic  
35  
36 performance, travel plans, personal or family financial hardship, and the need for personal  
37  
38 protective equipment, which were only associated with psychological distress.  
39  
40  
41  
42  
43  
44

45 Among the trainees with active clinical duties, those with distress were more likely to report  
46  
47 work-family conflict (ORs 2.20 - 2.68; Table 5). In contrast, adequate social support (ORs  
48  
49 0.42 - 0.47) and reasonable work arrangements (ORs 0.40 - 0.47) were associated with lower  
50  
51 psychological distress. A similar pattern was found for ASR.  
52  
53  
54  
55

## 56 **Discussion**

57  
58 In this large-scale cross-sectional study, we found that psychological distress was common  
59  
60



1  
2  
3 1 among healthcare trainees during the COVID-19 outbreak. Medical trainees, particularly  
4  
5 2 postgraduates and those with active clinical duties, were at higher risk for psychological  
6  
7 3 distress, compared to those in other training programs or at an earlier training stage. Concerns  
8  
9 4 about mental health were strongly correlated with psychological distress among trainees with  
10  
11 5 no clinical duties, whereas work-family conflict was the greatest concern of distressed  
12  
13 6 trainees with active clinical duties.  
14  
15  
16  
17  
18

19 8 The strain of COVID-19 on healthcare systems, medical trainees, and other practitioners is  
20  
21 9 challenging. Consistent with prior research<sup>6, 18, 19</sup>, our results indicated that psychological  
22  
23 10 distress was common among healthcare trainees, especially those in medical training  
24  
25 11 programs. Conversely, several studies reported that nurses providing care for confirmed or  
26  
27 12 suspected COVID-19 cases had a greater mental burden than doctors<sup>6, 20</sup>. Given the small  
28  
29 13 proportion of participants (4.59%) who had direct contact with infected patients, these  
30  
31 14 inconsistent estimates do not invalidate each other.  
32  
33  
34  
35  
36  
37

38 16 Another important finding was the association of being in the advanced training stage and  
39  
40 17 having active clinical duties with higher levels of psychological distress. Academic pressures,  
41  
42 18 workload, and financial burden increase with level of training, which could, consequently,  
43  
44 19 increase the mental vulnerability of senior trainees, and ultimately, contribute to negative  
45  
46 20 mental outcomes<sup>21-25</sup>. During the COVID-19 outbreak, senior medical students and residents  
47  
48 21 were encouraged to assist hospital staff with clinical work to deal with the severe workforce  
49  
50 22 shortage<sup>26, 27</sup>. The overwhelming workload and high risk of exposure to COVID-19 might  
51  
52 23 have added to their mental burden. We consistently observed a higher risk of psychological  
53  
54 24 distress across all training stages among individuals who were involved in active clinical  
55  
56 25 duties during the outbreak.  
57  
58  
59  
60

1  
2  
3 1  
4  
5 2 ASR often develops following direct exposure to traumatic events, such as experiencing the  
6  
7 3 COVID-19 outbreak in the epicenter and being charged with the direct care (diagnosis and  
8  
9 4 treatment) of patients confirmed with COVID-19<sup>6, 28</sup>. However, few participants were  
10  
11 5 quarantined in the epicenter or had direct contact with infected patients at the time of the  
12  
13 6 survey. The risk for ASR was relatively low and differences between the training programs  
14  
15 7 and stages were small. Interestingly, we found that trainees with active clinical duties had  
16  
17 8 fewer ASR symptoms during the outbreak.  
18  
19  
20  
21  
22 9

23  
24 10 Our findings suggest that being infected by COVID-19 was the healthcare trainees' leading  
25  
26 11 concern, followed by concerns about their mental health, with regards to psychological  
27  
28 12 distress and ASR. Adequate personal protective equipment and salary incentives might help  
29  
30 13 reduce psychological distress, which is consistent with the finding that family-income  
31  
32 14 stability is a protective factor against anxiety among medical students<sup>29</sup>. Among clinical  
33  
34 15 workers, work-family conflict was positively associated with psychological distress, and  
35  
36 16 negatively associated with social support. Therefore, adequate personal protection, timely  
37  
38 17 psychological interventions, a stable financial situation, a strong family, and social support  
39  
40 18 may be key factors in reducing the risk of psychological distress among healthcare trainees.  
41  
42 19 Competent leadership, including active participation in outbreak preparedness and making  
43  
44 20 reasonable work arrangements, could also alleviate the emotional strain on healthcare  
45  
46 21 trainees, suggesting the importance of work-policies for healthcare trainees.  
47  
48  
49  
50  
51  
52 22

53  
54 23 Studies have found that experiencing psychological distress during the training stage leads to  
55  
56 24 changes in career paths<sup>30-32</sup>. These results are consistent with our finding that healthcare  
57  
58 25 trainees who decided to work in non-medical fields in the future tended to have higher levels  
59  
60

1  
2  
3 1 of psychological distress, compared to the trainees determined to continue on their original  
4  
5 2 paths. During the COVID-19 outbreak, healthcare trainees might have been emotionally  
6  
7 3 vulnerable to the crisis, because of being knowledgeable about medicine, which increased  
8  
9 4 their awareness of the dangers during the outbreak's early stages. The epidemic represents an  
10  
11 5 extreme situation in which being a "doctor" is considered a demanding job with social  
12  
13 6 responsibilities, which might have scared or inspired medical trainees, especially those  
14  
15 7 without clinical experience. It is therefore, possible that this crisis also influenced their career  
16  
17 8 choices.  
18  
19  
20  
21  
22  
23

## 24 10 **Limitations**

25  
26 11 Our study has several limitations. First, given the nature of cross-sectional analyses, our data  
27  
28 12 do not indicate changes in psychological distress from the pre-pandemic period; rather, they  
29  
30 13 characterize the burden during the COVID-19 outbreak. Second, the response rate was low  
31  
32 14 among the residents, and those who did not participate might have been the trainees with  
33  
34 15 highest stress levels at work. The participation rates of undergraduate and postgraduate  
35  
36 16 trainees were satisfactory (73.22% and 71.49% respectively). Such selection is not likely to  
37  
38 17 provide a thorough explanation of our findings. Third, we only measured distress symptoms  
39  
40 18 once in the early phase of the outbreak. Longitudinal studies are needed in the future, as  
41  
42 19 symptoms may change over time. Fourth, although the effects of age, sex, training program,  
43  
44 20 and training stage were adjusted for their corresponding data analyses, residual confounding  
45  
46 21 remains because data on other confounding factors were inapplicable (i.e., marital status,  
47  
48 22 current location, job position) or not collected (i.e. socioeconomic status). Last, although the  
49  
50 23 trainees came from all parts of China, our study was conducted at a single medical school and  
51  
52 24 teaching hospital. The generalizability of our findings to other hospitals and medical  
53  
54 25 populations remains unclear, and therefore, needs further investigation.  
55  
56  
57  
58  
59  
60

1

## 2 **Conclusions**

3 Our findings suggest that psychological distress in response to the COVID-19 outbreak is  
4 common among healthcare trainees in China. Medical trainees, particularly postgraduates and  
5 with active clinical duties, were at higher risk for psychological distress than the other groups  
6 of trainees. Stress management should be provided for high-risk healthcare trainees during  
7 the outbreak, particularly if or when the training is accelerated, and trainees join the front  
8 lines of the workforce.

9

10 **Acknowledgments:** The authors thank Lie Zhang (West China School of Medicine of  
11 Sichuan University, Chengdu, China) for coordinating the data collection; Fenfen Ge (West  
12 China Hospital of Sichuan University, Chengdu, China), Ting Liu (West China Hospital of  
13 Sichuan University, Chengdu, China) and Xiao Liao (Southwest University, Chongqing,  
14 China) for data collection. Mr Zhang, Miss Ge, Miss Liu and Miss Liao have no conflicts of  
15 interest to declare. We also thank the participating students at the West China School of  
16 Medicine.

17

18 **Contributors:** Drs Zhang, Lu and Song had full access to all of the data in the study and take  
19 responsibility for the integrity of the data and the accuracy of the data analysis. Wang and Li  
20 contributed equally to the work.

21 Concept and design: Wang, Li, Zhang.

22 Acquisition, analysis, or interpretation of data: Wang, Li, Song, Feng.

23 Drafting of the manuscript: Wang, Li, Song, Lu.

24 Critical revision of the manuscript for important intellectual content: all authors.

25 Statistical analysis: Wang, Jiang.

1  
2  
3 1 Obtained funding: Zhang, Song, Lu.  
4

5 2 Administrative, technical, or material support: Zhang, Song, Lu, Feng.  
6

7 3 Supervision: Zhang, Song, Lu.  
8

9  
10 4 All authors have contributed significantly to this work and have met the qualification of  
11  
12 5 authorship.  
13  
14 6

15  
16  
17 7 **Funding:** This research was supported by the National Natural Science Foundation of China  
18  
19 8 (No. 81971262 to Dr. Song, No. 81801359 to Dr. Lu), Swedish Research Council (No. 2018-  
20  
21 9 00648 to Dr. Lu), West China Hospital COVID-19 Epidemic Science and Technology Project  
22  
23 10 (No. HX-2019-nCoV-014 to Dr. Song, No. HX-2019-nCoV-019 to Dr. Zhang), and Sichuan  
24  
25 11 University Emergency Grant (No. 2020scunCoVyingji1002 to Dr. Song, No.  
26  
27 12 2020scunCoVyingji1005 to Dr. Zhang).  
28  
29  
30  
31  
32

33 14 **Competing interests:** All authors declare no competing interests.  
34  
35  
36  
37  
38  
39

40 16 **Patient and public involvement:** Patients and/or the public were not involved in the design,  
41  
42 17 or conduct, or reporting, or dissemination plans of this research.  
43  
44  
45  
46  
47  
48  
49

50 19 **Ethics approval:** This study was approved by the Ethics Committee of the Sichuan  
51  
52 20 University.  
53  
54  
55  
56  
57  
58

59 22 **Data availability statement:** The data that support the findings of this study are available  
60 23 from the corresponding author, WZ, upon reasonable request.  
24  
25

25 **Reference**

- 1 1. WHO. World Health Organization: Coronavirus disease (COVID-19) outbreak situation. World  
2 Health Organization, 2020.
- 3 2. Shi L, Lu Z-A, Que J-Y, Huang X-L, Liu L, Ran M-S, et al. Prevalence of and Risk Factors  
4 Associated With Mental Health Symptoms Among the General Population in China During the  
5 Coronavirus Disease 2019 Pandemic. *JAMA network open*. 2020; 3(7): e2014053-e.
- 6 3. Shechter A, Diaz F, Moise N, Anstey DE, Ye S, Agarwal S, et al. Psychological distress, coping  
7 behaviors, and preferences for support among New York healthcare workers during the COVID-19  
8 pandemic. *General hospital psychiatry*. 2020; 66: 1-8.
- 9 4. Temsah M-H, Al-Sohime F, Alamro N, Al-Eyadhy A, Al-Hasan K, Jamal A, et al. The psychological  
10 impact of COVID-19 pandemic on health care workers in a MERS-CoV endemic country. *J Infect Public  
11 Health*. 2020; 13(6): 877-82.
- 12 5. Zerbini G, Ebigbo A, Reicherts P, Kunz M, Messman H. Psychosocial burden of healthcare  
13 professionals in times of COVID-19 - a survey conducted at the University Hospital Augsburg. *Ger Med  
14 Sci*. 2020; 18: Doc05-Doc.
- 15 6. Lai J, Ma S, Wang Y, Cai Z, Hu J, Wei N, et al. Factors Associated With Mental Health Outcomes  
16 Among Health Care Workers Exposed to Coronavirus Disease 2019. *JAMA network open*. 2020; 3(3):  
17 e203976-e.
- 18 7. Chew NWS, Lee GKH, Tan BYQ, Jing M, Goh Y, Ngiam NJH, et al. A multinational, multicentre  
19 study on the psychological outcomes and associated physical symptoms amongst healthcare workers  
20 during COVID-19 outbreak. *Brain, behavior, and immunity*. 2020; 88: 559-65.
- 21 8. Baker DM, Bhatia S, Brown S, Cambridge W, Kamarajah SK, A K, et al. Medical student  
22 involvement in the COVID-19 response. *Lancet*. 2020; 395(10232): 1254.
- 23 9. Bauchner H, Sharfstein J. A Bold Response to the COVID-19 Pandemic: Medical Students,  
24 National Service, and Public Health. *JAMA*. 2020.
- 25 10. Health Commission of Sichuan Province C. The latest situation of new coronavirus pneumonia in  
26 Sichun province (released on February 7, 2020). (ed HCoS Province). Available from:  
27 <https://dwz.cn/Y1p9dhTI>, 2020.
- 28 11. Kang Y-k, Guo W-J, Xu H, Chen Y-h, Li X-j, Tan Z-p, et al. The 6-item Kessler psychological  
29 distress scale to survey serious mental illness among Chinese undergraduates: Psychometric  
30 properties and prevalence estimate. *Comprehensive Psychiatry*. 2015; 63.
- 31 12. Furukawa TA, Kawakami N, Saitoh M, Ono Y, Nakane Y, Nakamura Y, et al. The performance of  
32 the Japanese version of the K6 and K10 in the World Mental Health Survey Japan. *International Journal  
33 of Methods in Psychiatric Research*. 2008; 17(3): 152-8.
- 34 13. Kessler RC, Green JG, Gruber MJ, Sampson NA, Bromet E, Cuitan M, et al. Screening for serious  
35 mental illness in the general population with the K6 screening scale: results from the WHO World Mental  
36 Health (WMH) survey initiative (vol 19, pg 4, 2010). *International Journal of Methods in Psychiatric  
37 Research*. 2011; 20(1): 62-.
- 38 14. Wu KK, Chan KS. The development of the Chinese version of Impact of Event Scale--Revised  
39 (CIES-R). (0933-7954 (Print)).
- 40 15. Lai YH, Lee YH, Chen YR, Hung YJ. Psychometric Testing of the Impact of Event Scale-Revised

- 1  
2  
3  
4 1 (IES-R) Chinese Version and Current Status in Three Major Types of Cancer Survivors in Taiwan.  
5 2 Psycho-Oncology. 2014; 23: 156-.
- 6  
7 3 16. Imsiragic AS, Begic D, Martic-Biocina S. Acute Stress and Depression 3 Days after Vaginal  
8 4 Delivery - Observational, Comparative Study. Collegium Antropologicum. 2009; 33(2): 521-7.
- 9  
10 5 17. HUANG D, YIN W, ZHANG Y, WANG P, SUN K. Effects of Social and Policy Supports on Work-  
11 6 family Conflict in Physicians. Chinese Mental Health Journal. 2009; 23(01): 27-32.
- 12  
13 7 18. Liu C, Yang Y-z, Zhang XM, Xu X, Dou Q-L, Zhang W-W. The prevalence and influencing factors  
14 8 for anxiety in medical workers fighting COVID-19 in China: A cross-sectional survey. medRxiv. 2020:  
15 9 2020.03.05.20032003.
- 16  
17 10 19. Zhang W-R, Wang K, Yin L, Zhao W-F, Xue Q, Peng M, et al. Mental Health and Psychosocial  
18 11 Problems of Medical Health Workers during the COVID-19 Epidemic in China. Psychotherapy and  
19 12 psychosomatics. 2020: 1-9.
- 20  
21 13 20. Liu ZR, Han B, Jiang RM, Huang YQ, Ma C, Wen J, et al. Mental Health Status of Doctors and  
22 14 Nurses During COVID-19 Epidemic in China (3/4/2020). Available from:  
23 15 <http://dxdoiorg/102139/ssrn3551329>.
- 24  
25 16 21. Dyrbye L, Thomas M, Shanafelt T. Medical Student Distress: Causes, Consequences, and  
26 17 Proposed Solutions. Mayo Clinic proceedings Mayo Clinic. 2006; 80: 1613-22.
- 27  
28 18 22. Chunming WM, Harrison R, MacIntyre R, Travaglia J, Balasooriya C. Burnout in medical students:  
29 19 a systematic review of experiences in Chinese medical schools. BMC Medical Education. 2017; 17(1):  
30 20 217.
- 31  
32 21 23. Levey RE. Sources of stress for residents and recommendations for programs to assist them. Acad  
33 22 Med. 2001; 76(2): 142-50.
- 34  
35 23 24. Dyrbye LN, Thomas MR, Massie FS, Power DV, Eacker A, Harper W, et al. Burnout and suicidal  
36 24 ideation among U.S. medical students. Ann Intern Med. 2008; 149(5): 334-41.
- 37  
38 25 25. Moffat KJ, McConnachie A Fau - Ross S, Ross S Fau - Morrison JM, Morrison JM. First year  
39 26 medical student stress and coping in a problem-based learning medical curriculum. (0308-0110 (Print)).
- 40  
41 27 26. Stokes DC. Senior Medical Students in the COVID-19 Response: An Opportunity to Be Proactive.  
42 28 Academic emergency medicine : official journal of the Society for Academic Emergency Medicine. 2020;  
43 29 27(4): 343-5.
- 44  
45 30 27. Services CfMM. Teaching Hospitals, Teaching Physicians and Medical Residents: CMS  
46 31 Flexibilities to Fight COVID-19. (ed CfMM Services): 2020.
- 47  
48 32 28. Sun L, Sun Z, Wu L, Zhu Z, Zhang F, Shang Z, et al. Prevalence and Risk Factors of Acute  
49 33 Posttraumatic Stress Symptoms during the COVID-19 Outbreak in Wuhan, China. medRxiv. 2020:  
50 34 2020.03.06.20032425.
- 51  
52 35 29. Cao W, Fang Z, Hou G, Han M, Xu X, Dong J, et al. The psychological impact of the COVID-19  
53 36 epidemic on college students in China. Psychiatry research. 2020; 287: 112934.
- 54  
55 37 30. Melincavage SM. Student nurses' experiences of anxiety in the clinical setting. (1532-2793  
56 38 (Electronic)).
- 57  
58 39 31. Hawkins M. 2017 Final Year Medical Residents Survey. 2018.
- 59  
60 40 32. Scharer S, Freitag A. Physicians' exodus: why medical graduates leave Austria or do not work in

1  
2  
3  
4  
5  
6  
7  
8  
9  
10  
11  
12  
13  
14  
15  
16  
17  
18  
19  
20  
21  
22  
23  
24  
25  
26  
27  
28  
29  
30  
31  
32  
33  
34  
35  
36  
37  
38  
39  
40  
41  
42  
43  
44  
45  
46  
47  
48  
49  
50  
51  
52  
53  
54  
55  
56  
57  
58  
59  
60

1 clinical practice. (1613-7671 (Electronic)).  
2

For peer review only



1 Table 1 Characteristics of healthcare trainees – N (%) or mean (SD).

|                                           | All          | Medicine     | Medical technology | Nursing      | P     |
|-------------------------------------------|--------------|--------------|--------------------|--------------|-------|
| <b>Participants, N</b>                    | 4184         | 2727 (65.18) | 944 (22.56)        | 513 (12.26)  |       |
| <b>Age, years, mean (SD)</b>              | 23.41 (3.81) | 24.20 (3.84) | 21.90 (3.24)       | 21.98 (3.36) | <0.01 |
| <b>Sex</b>                                |              |              |                    |              | <0.01 |
| Male                                      | 1469 (35.11) | 1133 (41.55) | 265 (28.07)        | 71 (13.84)   |       |
| Female                                    | 2715 (64.89) | 1594 (58.45) | 679 (71.93)        | 442 (86.16)  |       |
| <b>Marital status</b>                     |              |              |                    |              | <0.01 |
| Married                                   | 331 (7.91)   | 254 (9.31)   | 48 (5.08)          | 29 (5.65)    |       |
| Unmarried                                 | 3853 (92.09) | 2473 (90.69) | 896 (94.92)        | 484 (94.35)  |       |
| <b>Training stage</b>                     |              |              |                    |              | <0.01 |
| Undergraduate                             | 1791 (42.81) | 940 (34.47)  | 588 (62.29)        | 263 (51.27)  |       |
| Postgraduate                              | 1890 (45.17) | 1662 (60.95) | 142 (15.04)        | 86 (16.76)   |       |
| Residency                                 | 503 (12.02)  | 125 (4.58)   | 214 (22.67)        | 164 (31.97)  |       |
| <b>Location</b>                           |              |              |                    |              | 0.02  |
| Hubei <sup>a</sup>                        | 67 (1.60)    | 46 (1.69)    | 20 (2.12)          | 1 (0.19)     |       |
| Outside Hubei                             | 4117 (98.40) | 2681 (98.31) | 924 (97.88)        | 512 (99.81)  |       |
| <b>Relatives with COVID-19</b>            |              |              |                    |              | 0.90  |
| No                                        | 4153 (99.26) | 2706 (99.23) | 937 (99.26)        | 510 (99.42)  |       |
| Yes                                       | 31 (0.74)    | 21 (0.77)    | 7 (0.74)           | 3 (0.58)     |       |
| <b>Active clinical duty</b>               |              |              |                    |              | <0.01 |
| No                                        | 3356 (80.21) | 2301 (84.38) | 719 (76.17)        | 336 (65.50)  |       |
| Yes                                       | 828 (19.79)  | 426 (15.62)  | 225 (23.83)        | 177 (34.50)  |       |
| <b>Working position <sup>b</sup></b>      |              |              |                    |              | <0.01 |
| Frontline <sup>c</sup>                    | 74 (8.94)    | 36 (8.54)    | 5 (2.22)           | 33 (18.64)   |       |
| Second-line                               | 754 (91.06)  | 390 (91.55)  | 220 (97.78)        | 144 (81.36)  |       |
| <b>Contact with COVID-19 <sup>b</sup></b> |              |              |                    |              | 0.11  |
| Yes                                       | 38 (4.59)    | 24 (5.63)    | 11 (4.89)          | 3 (1.69)     |       |
| No                                        | 790 (95.41)  | 402 (94.37)  | 214 (95.11)        | 174 (98.31)  |       |

2 a. Hubei Province was the epicenter at the time of the survey.

3 b. Information was only assessed for participants with activity clinical duty.

4 c. Frontline working positions was defined as working in departments directly engaging in care for patients with COVID-19,  
5 including Emergency, Respiratory, Critical Care Medicine, and Infectious Disease Departments.



1 Table 3 Psychological distress and Acute stress reaction among healthcare trainees with and without active clinical duty.

|                             | Psychological distress <sup>a</sup> |                        |             |                         | Acute stress reaction <sup>b</sup> |                        |             |                         |
|-----------------------------|-------------------------------------|------------------------|-------------|-------------------------|------------------------------------|------------------------|-------------|-------------------------|
|                             | Symptoms (z-score)                  |                        | Cases       |                         | Symptoms (z-score)                 |                        | Cases       |                         |
|                             | Mean±SD                             | β (95%CI) <sup>c</sup> | N (%)       | OR (95%CI) <sup>c</sup> | Mean±SD                            | β (95%CI) <sup>c</sup> | N (%)       | OR (95%CI) <sup>c</sup> |
| <b>Active clinical duty</b> |                                     |                        |             |                         |                                    |                        |             |                         |
| No                          | -0.03±0.99                          | Ref.                   | 882 (29.73) | Ref.                    | 0.02±1.02                          | Ref.                   | 326 (10.84) | Ref.                    |
| Yes                         | 0.12±1.02                           | 0.09 (0.01 - 0.18)     | 268 (35.50) | 1.17 (0.98 - 1.39)      | -0.07±0.92                         | -0.10 (-0.19 - -0.02)  | 77 (10.36)  | 0.93 (0.71 - 1.22)      |
| <b>By training program</b>  |                                     |                        |             |                         |                                    |                        |             |                         |
| Medicine                    |                                     |                        |             |                         |                                    |                        |             |                         |
| No duty                     | -0.00 <sup>d</sup> ±1.02            | Ref.                   | 609 (30.53) | Ref.                    | 0.01±1.02                          | Ref.                   | 212 (10.47) | Ref.                    |
| With duty                   | 0.39±1.10                           | 0.36 (0.24 - 0.47)     | 183 (47.04) | 1.85 (1.47 - 2.33)      | -0.00 <sup>d</sup> ±0.98           | -0.01 (-0.12 - 0.11)   | 44 (11.67)  | 1.12 (0.77 - 1.58)      |
| Medical technology          |                                     |                        |             |                         |                                    |                        |             |                         |
| No duty                     | -0.08±0.94                          | Ref.                   | 184 (27.84) | Ref.                    | 0.04±1.02                          | Ref.                   | 76 (11.38)  | Ref.                    |
| With duty                   | -0.06±0.86                          | -0.04 (-0.20 - 0.12)   | 58 (28.29)  | 0.94 (0.64 - 1.38)      | -0.03±0.88                         | -0.08 (-0.25 - 0.09)   | 20 (9.76)   | 0.89 (0.50 - 1.57)      |
| Nursing                     |                                     |                        |             |                         |                                    |                        |             |                         |
| No duty                     | -0.10±0.90                          | Ref.                   | 89 (28.62)  | Ref.                    | 0.03±1.01                          | Ref.                   | 38 (12.06)  | Ref.                    |
| With duty                   | -0.33±0.75                          | -0.19 (-0.37 - -0.01)  | 27 (16.77)  | 0.55 (0.32 - 0.93)      | -0.30±0.78                         | -0.30 (-0.49 - -0.10)  | 13 (8.07)   | 0.69 (0.32 - 1.40)      |
| <b>By training stage</b>    |                                     |                        |             |                         |                                    |                        |             |                         |
| Undergraduate               |                                     |                        |             |                         |                                    |                        |             |                         |
| No duty                     | -0.10±0.96                          | Ref.                   | 442 (26.98) | Ref.                    | 0.02±1.05                          | Ref.                   | 181 (10.96) | Ref.                    |
| With duty                   | 0.54±1.18                           | 0.62 (0.17 - 1.08)     | 11 (61.11)  | 4.20 (1.61 - 11.70)     | -0.05±1.16                         | 0.01 (-0.49 - 0.51)    | 3 (16.67)   | 1.75 (0.39 - 5.58)      |
| Postgraduate                |                                     |                        |             |                         |                                    |                        |             |                         |
| No duty                     | 0.06±1.02                           | Ref.                   | 440 (33.11) | Ref.                    | 0.01±0.97                          | Ref.                   | 145 (10.69) | Ref.                    |
| With duty                   | 0.52±1.14                           | 0.49 (0.35 - 0.62)     | 146 (51.59) | 2.23 (1.72 - 2.91)      | 0.06±1.03                          | 0.07 (-0.06 - 0.20)    | 37 (13.50)  | 1.35 (0.90 - 1.97)      |
| Residency                   |                                     |                        |             |                         |                                    |                        |             |                         |
| No duty                     | -                                   | Ref.                   | -           | Ref.                    | -                                  | Ref.                   | -           | Ref.                    |
| With duty                   | -0.15±0.82                          | -                      | 111 (24.45) | -                       | -0.16±0.82                         | -                      | 37 (8.20)   | -                       |

2 a. In this analysis, 462 (11.04%) individuals who missed the measure of psychological distress were not included.  
3 b. In this analysis, 433 (10.35%) individuals who missed the measure of acute stress reaction were not included.  
4 c. Estimates were adjusted for age, sex (male or female), marital status (married or unmarried), location (Hubei or outside Hubei), and relatives with COVID-19 (yes or no).  
5 d. -0.00: < -0.01  
6

1 Table 4. Associations of concerns and needs during COVID-19 outbreaks with psychological distress and Acute stress reaction among  
2 healthcare trainees without active clinical duty.

|                                                                     | Psychological distress <sup>a</sup> |             |                         | Acute stress reaction <sup>b</sup> |             |                         |
|---------------------------------------------------------------------|-------------------------------------|-------------|-------------------------|------------------------------------|-------------|-------------------------|
|                                                                     | No (n=2085)                         | Yes (n=882) |                         | No (n=2682)                        | Yes (n=326) |                         |
|                                                                     | N (%)                               | N (%)       | OR (95%CI) <sup>c</sup> | N (%)                              | N (%)       | OR (95%CI) <sup>c</sup> |
| <b>Concerns</b>                                                     |                                     |             |                         |                                    |             |                         |
| Being infected with the novel coronavirus                           | 1298 (66.84)                        | 644 (33.16) | 1.33 (1.09 - 1.61)      | 1713 (87.00)                       | 256 (13.00) | 1.42 (1.05 - 1.95)      |
| Physical health condition                                           | 458 (59.17)                         | 316 (40.83) | 1.41 (1.16 - 1.72)      | 630 (80.36)                        | 154 (19.64) | 1.81 (1.37 - 2.39)      |
| Psychological health                                                | 189 (46.78)                         | 215 (53.22) | 2.41 (1.90 - 3.04)      | 294 (71.01)                        | 120 (28.99) | 3.24 (2.42 - 4.31)      |
| Academic performance                                                | 1195 (66.24)                        | 609 (33.76) | 1.30 (1.09 - 1.56)      | 1606 (87.95)                       | 220 (12.05) | 0.97 (0.74 - 1.27)      |
| Social life and work                                                | 383 (64.37)                         | 212 (35.63) | 1.19 (0.95 - 1.48)      | 505 (83.61)                        | 99 (16.39)  | 1.38 (1.01 - 1.87)      |
| Traveling plans                                                     | 141 (58.02)                         | 102 (41.98) | 1.36 (1.01 - 1.82)      | 201 (81.38)                        | 46 (18.62)  | 1.22 (0.81 - 1.79)      |
| Family members or friends being infected with the novel coronavirus | 1297 (68.41)                        | 599 (31.59) | 0.94 (0.78 - 1.13)      | 1688 (87.96)                       | 231 (12.04) | 0.91 (0.69 - 1.21)      |
| Personal and family's financial situation                           | 249 (59.29)                         | 171 (40.71) | 1.27 (1.01 - 1.61)      | 353 (82.48)                        | 75 (17.52)  | 1.18 (0.85 - 1.61)      |
| <b>Needs</b>                                                        |                                     |             |                         |                                    |             |                         |
| Personal protective equipment                                       | 1907 (69.50)                        | 837 (30.50) | 1.51 (1.07 - 2.16)      | 2485 (89.26)                       | 299 (10.74) | 0.74 (0.48 - 1.18)      |
| Social insurance                                                    | 1819 (69.24)                        | 808 (30.76) | 1.31 (0.98 - 1.76)      | 2371 (89.03)                       | 292 (10.97) | 0.86 (0.58 - 1.32)      |
| Salary incentives                                                   | 1386 (68.21)                        | 646 (31.79) | 1.37 (1.12 - 1.67)      | 1809 (87.69)                       | 254 (12.31) | 1.79 (1.32 - 2.44)      |
| Clinical practice guidance                                          | 1317 (70.58)                        | 549 (29.42) | 0.89 (0.73 - 1.08)      | 1672 (88.42)                       | 219 (11.58) | 1.13 (0.85 - 1.50)      |
| Professional track record                                           | 1213 (70.16)                        | 516 (29.84) | 0.91 (0.75 - 1.11)      | 1551 (88.63)                       | 199 (11.37) | 0.92 (0.69 - 1.23)      |
| <b>Future career choice</b>                                         |                                     |             |                         |                                    |             |                         |
| Healthcare worker                                                   | 1256 (73.80)                        | 446 (26.20) | Ref.                    | 1587 (91.89)                       | 140 (8.11)  | Ref.                    |
| Medicine-related - but not bedside                                  | 618 (69.52)                         | 271 (30.84) | 1.26 (1.05 - 1.52)      | 791 (87.89)                        | 109 (12.11) | 1.54 (1.17 - 2.02)      |
| Outside of medicine                                                 | 36 (50.70)                          | 35 (49.30)  | 2.89 (1.77 - 4.69)      | 51 (72.86)                         | 19 (27.14)  | 4.10 (2.29 - 7.09)      |
| Indeterminate                                                       | 175 (57.38)                         | 130 (42.62) | 2.11 (1.64 - 2.72)      | 253 (81.35)                        | 58 (18.65)  | 2.57 (1.82 - 3.58)      |

3 a. In this analysis, 389 (11.59%) individuals who missed the measure of psychological distress were not included.

4 b. In this analysis, 348 (10.37%) individuals who missed the measure of acute stress reaction were not included.

5 c. Estimates were adjusted for age, sex (male or female), marital status (married or unmarried), location (Hubei or outside Hubei), relatives with COVID-19 (yes or no), training programs  
6 (medicine, medical technology or nursing), and training stage (undergraduate, postgraduate or residency).  
7

1 Table 5 Associations of family-work conflicts during COVID-19 outbreak with psychological distress and Acute stress reaction among  
 2 healthcare trainees with active clinical duty.  
 3

|                                                 | Psychological distress <sup>a</sup> |             |                         | Acute stress reaction <sup>b</sup> |             |                         |
|-------------------------------------------------|-------------------------------------|-------------|-------------------------|------------------------------------|-------------|-------------------------|
|                                                 | No (n=487)                          | Yes (n=268) |                         | No (n=666)                         | Yes (n=77)  |                         |
|                                                 | N (%)                               | N (%)       | OR (95%CI) <sup>c</sup> | N (%)                              | N (%)       | OR (95%CI) <sup>c</sup> |
| <b>Work-family conflict</b>                     |                                     |             |                         |                                    |             |                         |
| <b>Difficult to care for family due to work</b> |                                     |             |                         |                                    |             |                         |
| Agree                                           | 122 (18.32)                         | 28 (36.36)  | 2.53 (1.67 - 3.84)      | 59 (12.11)                         | 93 (34.70)  | 1.86 (1.06 - 3.22)      |
| Neutral                                         | 331 (49.70)                         | 42 (54.55)  | Ref.                    | 249 (5.13)                         | 135 (50.37) | Ref.                    |
| Disagree                                        | 213 (31.98)                         | 7 (9.09)    | 0.47 (0.31 - 0.72)      | 179 (36.76)                        | 40 (14.93)  | 0.25 (0.10 - 0.55)      |
| <b>Family responsibilities affected work</b>    |                                     |             |                         |                                    |             |                         |
| Agree                                           | 37 (5.56)                           | 14 (18.18)  | 2.20 (1.16 - 4.29)      | 19 (3.90)                          | 33 (12.31)  | 2.56 (1.22 - 5.20)      |
| Neutral                                         | 265 (39.79)                         | 44 (57.14)  | Ref.                    | 172 (35.32)                        | 145 (54.10) | Ref.                    |
| Disagree                                        | 364 (54.65)                         | 19 (24.88)  | 0.39 (0.28 - 0.56)      | 296 (60.78)                        | 90 (33.58)  | 0.31 (0.17 - 0.54)      |
| <b>Difficulties in juggling work and family</b> |                                     |             |                         |                                    |             |                         |
| Agree                                           | 36 (5.41)                           | 14 (18.18)  | 2.68 (1.35 - 5.56)      | 14 (2.87)                          | 37 (13.81)  | 2.44 (1.13 - 5.12)      |
| Neutral                                         | 246 (36.94)                         | 43 (55.84)  | Ref.                    | 155 (31.83)                        | 140 (52.24) | Ref.                    |
| Disagree                                        | 384 (57.66)                         | 20 (25.97)  | 0.37 (0.26 - 0.53)      | 318 (65.30)                        | 91 (33.96)  | 0.28 (0.15 - 0.50)      |
| <b>Social support</b>                           |                                     |             |                         |                                    |             |                         |
| <b>Support from family</b>                      |                                     |             |                         |                                    |             |                         |
| Agree                                           | 466 (69.97)                         | 35 (45.45)  | 0.47 (0.33 - 0.67)      | 359 (73.72)                        | 148 (55.22) | 0.41 (0.24 - 0.71)      |
| Neutral                                         | 166 (24.92)                         | 31 (40.26)  | Ref.                    | 107 (21.97)                        | 95 (35.45)  | Ref.                    |
| Disagree                                        | 34 (5.11)                           | 11 (14.29)  | 1.16 (0.59 - 2.33)      | 21 (4.31)                          | 25 (9.33)   | 1.62 (0.70 - 3.55)      |
| <b>Support from colleagues</b>                  |                                     |             |                         |                                    |             |                         |
| Agree                                           | 545 (81.83)                         | 44 (57.14)  | 0.42 (0.28 - 0.63)      | 414 (85.01)                        | 181 (67.54) | 0.32 (0.19 - 0.55)      |
| Neutral                                         | 110 (16.52)                         | 30 (38.96)  | Ref.                    | 65 (13.35)                         | 81 (30.22)  | Ref.                    |
| Disagree                                        | 11 (1.65)                           | 3 (3.90)    | 0.51 (0.15 - 1.70)      | 8 (1.64)                           | 6 (2.24)    | 0.99 (0.21 - 3.57)      |
| <b>Support from supervisors</b>                 |                                     |             |                         |                                    |             |                         |
| Agree                                           | 505 (75.83)                         | 30 (38.96)  | 0.42 (0.29 - 0.60)      | 389 (79.98)                        | 150 (55.97) | 0.22 (0.13 - 0.38)      |
| Neutral                                         | 146 (21.92)                         | 39 (50.65)  | Ref.                    | 87 (17.86)                         | 105 (39.18) | Ref.                    |
| Disagree                                        | 15 (2.25)                           | 8 (10.39)   | 0.86 (0.35 - 2.14)      | 11 (2.26)                          | 13 (4.85)   | 2.32 (0.85 - 6.04)      |
| <b>Policy support</b>                           |                                     |             |                         |                                    |             |                         |

|                                                     | Psychological distress <sup>a</sup> |             |                    | Acute stress reaction <sup>b</sup> |             |                    |
|-----------------------------------------------------|-------------------------------------|-------------|--------------------|------------------------------------|-------------|--------------------|
|                                                     | No (n=487)                          | Yes (n=268) |                    | No (n=666)                         | Yes (n=77)  |                    |
| <b>Reasonable holiday arrangement</b>               |                                     |             |                    |                                    |             |                    |
| Agree                                               | 463 (69.52)                         | 28 (36.36)  | 0.44 (0.30 - 0.65) | 369 (75.77)                        | 126 (47.01) | 0.27 (0.15 - 0.48) |
| Neutral                                             | 156 (23.42)                         | 34 (44.16)  | Ref.               | 94 (19.30)                         | 102 (38.06) | Ref.               |
| Disagree                                            | 47 (7.06)                           | 15 (19.48)  | 1.32 (0.72 - 2.44) | 24 (4.93)                          | 40 (14.93)  | 1.51 (0.72 - 3.07) |
| <b>Reasonable duty arrangement</b>                  |                                     |             |                    |                                    |             |                    |
| Agree                                               | 468 (70.27)                         | 29 (37.66)  | 0.47 (0.32 - 0.68) | 371 (76.18)                        | 129 (48.13) | 0.27 (0.15 - 0.47) |
| Neutral                                             | 163 (24.47)                         | 37 (48.05)  | Ref.               | 100 (20.53)                        | 106 (39.55) | Ref.               |
| Disagree                                            | 35 (5.26)                           | 11 (14.29)  | 1.69 (0.86 - 3.40) | 16 (3.29)                          | 33 (12.31)  | 1.27 (0.56 - 2.73) |
| <b>Flexible policies to balance family and work</b> |                                     |             |                    |                                    |             |                    |
| Agree                                               | 438 (65.77)                         | 25 (32.47)  | 0.40 (0.28 - 0.58) | 356 (73.10)                        | 109 (40.67) | 0.29 (0.16 - 0.52) |
| Neutral                                             | 200 (30.03)                         | 36 (46.75)  | Ref.               | 120 (24.64)                        | 123 (45.90) | Ref.               |
| Disagree                                            | 28 (4.20)                           | 16 (20.78)  | 3.09 (1.52 - 6.74) | 11 (2.26)                          | 36 (13.43)  | 3.47 (1.63 - 7.24) |

- 1 a. In this analysis, 85 (10.27%) individuals who missed the measure of psychological distress were not included.  
2 b. In this analysis, 73 (8.82%) individuals who missed the measure of acute stress reaction were not included.  
3 c. Estimates were adjusted for age, sex (male or female), marital status (married or unmarried), relatives with COVID-19 (yes or no), working position (frontline or second-line), contact with  
4 COVID-19 (yes or no), training programs (medicine, medical technology or nursing), and training stage (undergraduate, postgraduate or residency).

## Supplementary

Figure 1 Research Flow Chart

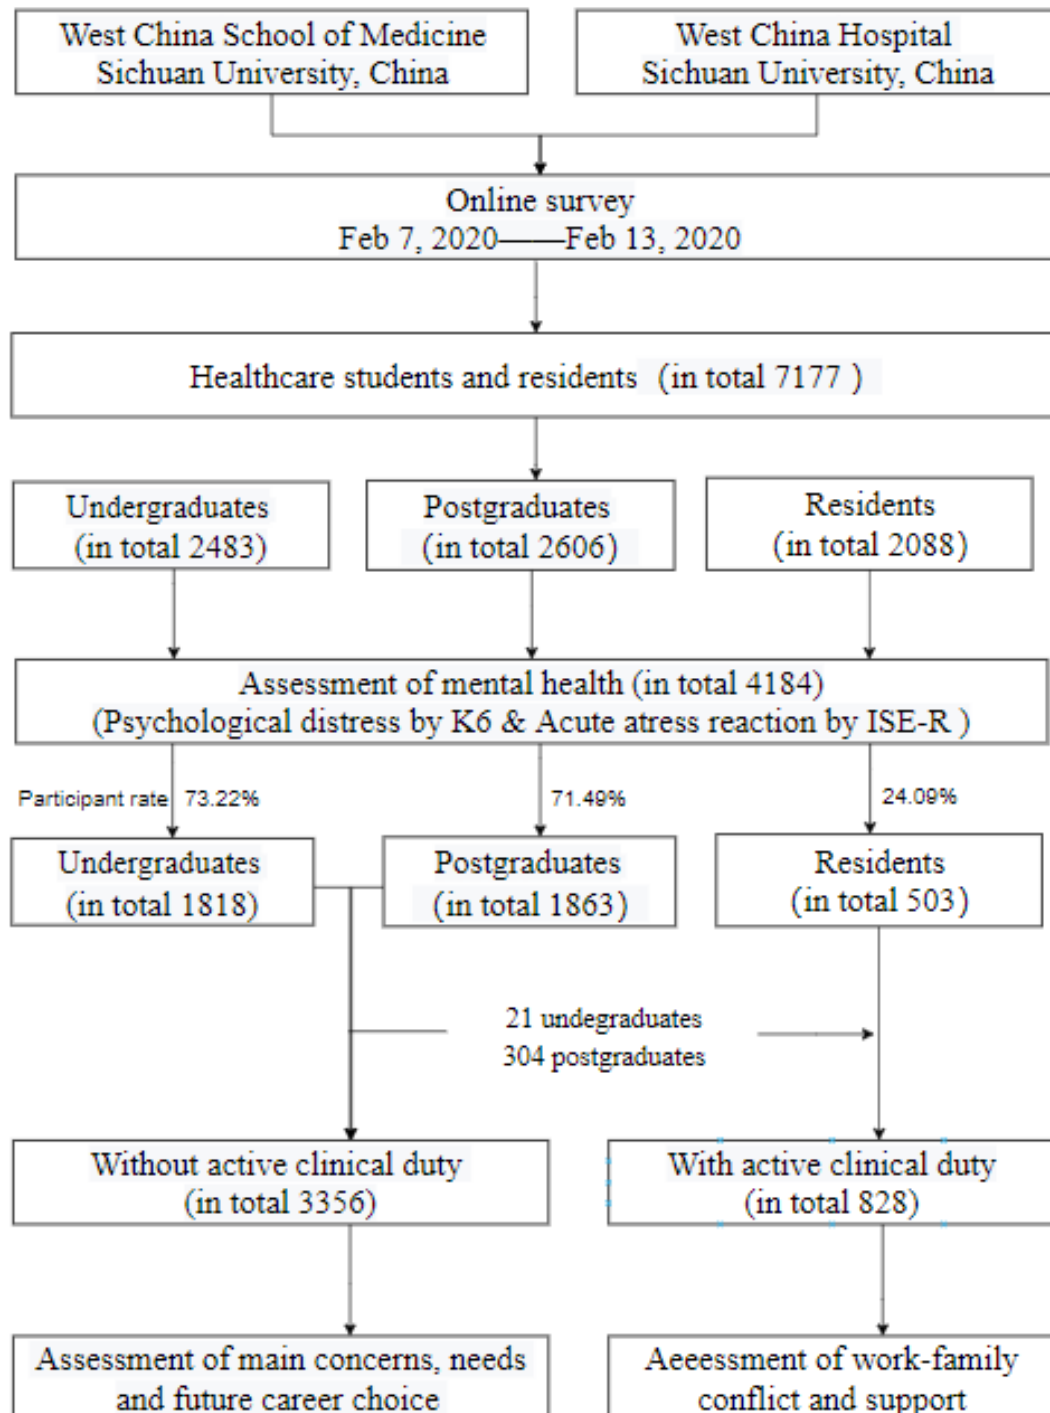

**Supplemental Text:****Demographic information**

- a) Age: \_\_\_\_\_ years
- b) Sex: A male, B female
- c) Training stage: A undergraduate, B postgraduate, C residency
- d) Training program: A medicine, B medical technology, C nursing
- e) Marital status: A married, B unmarried
- f) Location: \_\_\_\_\_ (current)
- g) Have you had relatives infected with COVID-19?  
A. No            B. Yes
- h) Are you actively performing clinical duties at this time?  
A. No            B. Yes

If Yes, go on:

- i) Working position: \_\_\_\_\_ department.
- ii) Since the outbreak, have you contacted with COVID-19 patients?  
A. Yes        B. No
- iii) Work-family conflict and support  
Since the outbreak,
  - a) my current job has made it difficult for me to care for my family.
  - b) family responsibilities have affected my work.
  - c) I had difficulties in juggling work and family.
  - d) I can get support from my family.
  - e) I can get support from my colleagues.
  - f) I can get support from my leader.
  - g) The hospital's holiday arrangement is reasonable.
  - h) The hospital's duty arrangement is reasonable.
  - i) The hospital has had a flexible policy that allowed me to juggle family and work.

If No, go on:

- i) Concerns during the outbreak (Multiple choices)  
Under the current circumstances, I am concerned about
  - a) being infected with the novel coronavirus;
  - b) my physical health condition;
  - c) my psychological health;
  - d) academic performance;
  - e) my social life and work;
  - f) my traveling plans;
  - g) the risk of infection from family members or friends;
  - h) my personal and family's financial situation;
  - i) other issues.
- ii) Needs during the outbreak (Multiple choices)



If I were to work during the outbreak, I would need

- a) personal protective equipment;
- b) social insurance;
- c) salary incentives;
- d) clinical practice guidance;
- e) professional track record;
- f) other needs.

iii) The influence on future career choice (single question)

Has the outbreak affected your future career plans? i) Healthcare worker; ii) Medicine-related, but not bedside; iii) Outside of medicine; iv) Indeterminate.

### Psychological distress

Since the COVID-19 outbreak,

- a) How often did you feel nervous?
- b) How often did you feel hopeless?
- c) How often did you feel restless or fidgety?
- d) How often did you feel so depressed that nothing could cheer you up?
- e) How often did you feel that everything was an effort?
- f) How often did you feel worthless?

### Acute stress reaction

During the past seven days concerning the COVID-19 outbreak, how much have you been distressed or bothered by these difficulties?

- a) Any reminder brought back feelings about it.
- b) I had trouble staying asleep.
- c) Other things kept making me think about it.
- d) I felt irritable and angry.
- e) I avoided letting myself get upset when I thought about it or reminded me of it.
- f) I thought about it when I did not mean to.
- g) I felt as if it had not happened or was not real.
- h) I stayed away from reminders of it.
- i) Pictures about it popped into my mind.
- j) I was jumpy and easily startled.
- k) I tried not to think about it.
- l) I was aware that I still had many feelings about it, but I did not deal with them.
- m) My feelings about it were kind of numb.
- n) I found myself acting or feeling like I was back at that time.
- o) I had trouble falling asleep.
- p) I had waves of strong feelings about it.
- q) I tried to remove it from my memory.
- r) I had trouble concentrating.
- s) Reminders of it caused me to have physical reactions, such as sweating, trouble breathing, nausea, or a pounding heart.

- 1
- 2
- 3
- 4 t) I had dreams about it.
- 5 u) I felt watchful and on-guard.
- 6 v) I tried not to talk about it.
- 7
- 8
- 9
- 10
- 11
- 12
- 13
- 14
- 15
- 16
- 17
- 18
- 19
- 20
- 21
- 22
- 23
- 24
- 25
- 26
- 27
- 28
- 29
- 30
- 31
- 32
- 33
- 34
- 35
- 36
- 37
- 38
- 39
- 40
- 41
- 42
- 43
- 44
- 45
- 46
- 47
- 48
- 49
- 50
- 51
- 52
- 53
- 54
- 55
- 56
- 57
- 58
- 59
- 60

For peer review only

STROBE Statement—Checklist of items that should be included in reports of *cross-sectional studies*

|                              | Item No | Recommendation                                                                                                                                                                                    | Page No                                     |
|------------------------------|---------|---------------------------------------------------------------------------------------------------------------------------------------------------------------------------------------------------|---------------------------------------------|
| <b>Title and abstract</b>    | 1       | (a) Indicate the study's design with a commonly used term in the title or the abstract                                                                                                            | 1                                           |
|                              |         | (b) Provide in the abstract an informative and balanced summary of what was done and what was found                                                                                               | 3-4                                         |
| <b>Introduction</b>          |         |                                                                                                                                                                                                   |                                             |
| Background/rationale         | 2       | Explain the scientific background and rationale for the investigation being reported                                                                                                              | 6                                           |
| Objectives                   | 3       | State specific objectives, including any prespecified hypotheses                                                                                                                                  | 6                                           |
| <b>Methods</b>               |         |                                                                                                                                                                                                   |                                             |
| Study design                 | 4       | Present key elements of study design early in the paper                                                                                                                                           | 6-7                                         |
| Setting                      | 5       | Describe the setting, locations, and relevant dates, including periods of recruitment, exposure, follow-up, and data collection                                                                   | 7                                           |
| Participants                 | 6       | (a) Give the eligibility criteria, and the sources and methods of selection of participants                                                                                                       | 7-8                                         |
| Variables                    | 7       | Clearly define all outcomes, exposures, predictors, potential confounders, and effect modifiers. Give diagnostic criteria, if applicable                                                          | 8-10                                        |
| Data sources/<br>measurement | 8*      | For each variable of interest, give sources of data and details of methods of assessment (measurement). Describe comparability of assessment methods if there is more than one group              | 6-11                                        |
| Bias                         | 9       | Describe any efforts to address potential sources of bias                                                                                                                                         | 10-11                                       |
| Study size                   | 10      | Explain how the study size was arrived at                                                                                                                                                         | 7                                           |
| Quantitative variables       | 11      | Explain how quantitative variables were handled in the analyses. If applicable, describe which groupings were chosen and why                                                                      | 10-11                                       |
| Statistical methods          | 12      | (a) Describe all statistical methods, including those used to control for confounding                                                                                                             | 10-11                                       |
|                              |         | (b) Describe any methods used to examine subgroups and interactions                                                                                                                               | Not applicable                              |
|                              |         | (c) Explain how missing data were addressed                                                                                                                                                       | 11;<br>23-27 (Table 2-5)                    |
|                              |         | (d) If applicable, describe analytical methods taking account of sampling strategy                                                                                                                | Not applicable                              |
|                              |         | (e) Describe any sensitivity analyses                                                                                                                                                             | Not applicable                              |
| <b>Results</b>               |         |                                                                                                                                                                                                   |                                             |
| Participants                 | 13*     | (a) Report numbers of individuals at each stage of study—eg numbers potentially eligible, examined for eligibility, confirmed eligible, included in the study, completing follow-up, and analysed | 7, 11-12;<br>22 (Table 1);<br>Supplementary |
|                              |         | (b) Give reasons for non-participation at each stage                                                                                                                                              | 7                                           |
|                              |         | (c) Consider use of a flow diagram                                                                                                                                                                | Supplementary                               |
| Descriptive data             | 14*     | (a) Give characteristics of study participants (eg demographic, clinical, social) and information on exposures and potential confounders                                                          | 11-12;<br>22 (Table 1);                     |

|                          |     |                                                                                                                                                                                                              |                          |
|--------------------------|-----|--------------------------------------------------------------------------------------------------------------------------------------------------------------------------------------------------------------|--------------------------|
|                          |     | (b) Indicate number of participants with missing data for each variable of interest                                                                                                                          | 11;<br>23-27 (Table 2-5) |
| Outcome data             | 15* | Report numbers of outcome events or summary measures                                                                                                                                                         | 11;<br>23-27 (Table 1-5) |
| Main results             | 16  | (a) Give unadjusted estimates and, if applicable, confounder-adjusted estimates and their precision (eg, 95% confidence interval). Make clear which confounders were adjusted for and why they were included | 11;<br>23-27 (Table 2-5) |
|                          |     | (b) Report category boundaries when continuous variables were categorized                                                                                                                                    | 9                        |
|                          |     | (c) If relevant, consider translating estimates of relative risk into absolute risk for a meaningful time period                                                                                             | Not applicable           |
| Other analyses           | 17  | Report other analyses done—eg analyses of subgroups and interactions, and sensitivity analyses                                                                                                               | Not applicable           |
| <b>Discussion</b>        |     |                                                                                                                                                                                                              |                          |
| Key results              | 18  | Summarise key results with reference to study objectives                                                                                                                                                     | 13-14                    |
| Limitations              | 19  | Discuss limitations of the study, taking into account sources of potential bias or imprecision. Discuss both direction and magnitude of any potential bias                                                   | 16                       |
| Interpretation           | 20  | Give a cautious overall interpretation of results considering objectives, limitations, multiplicity of analyses, results from similar studies, and other relevant evidence                                   | 13-16                    |
| Generalisability         | 21  | Discuss the generalisability (external validity) of the study results                                                                                                                                        | 16                       |
| <b>Other information</b> |     |                                                                                                                                                                                                              |                          |
| Funding                  | 22  | Give the source of funding and the role of the funders for the present study and, if applicable, for the original study on which the present article is based                                                | 18                       |

\*Give information separately for exposed and unexposed groups.

**Note:** An Explanation and Elaboration article discusses each checklist item and gives methodological background and published examples of transparent reporting. The STROBE checklist is best used in conjunction with this article (freely available on the Web sites of PLoS Medicine at <http://www.plosmedicine.org/>, Annals of Internal Medicine at <http://www.annals.org/>, and Epidemiology at <http://www.epidem.com/>). Information on the STROBE Initiative is available at [www.strobe-statement.org](http://www.strobe-statement.org).
