# Supplementary material for: COVID-19 outbreak–related psychological distress among healthcare trainees: a cross-sectional study in China
Source: PubMed Central journal article supplement (PMC7577057; doi:10.1136/bmjopen-2020-041671), 2020-10-20
Supplement: bmjopen-2020-041671supp001.pdf [file bmjopen-2020-041671supp001.pdf]

## Supplementary

Figure 1 Research Flow Chart

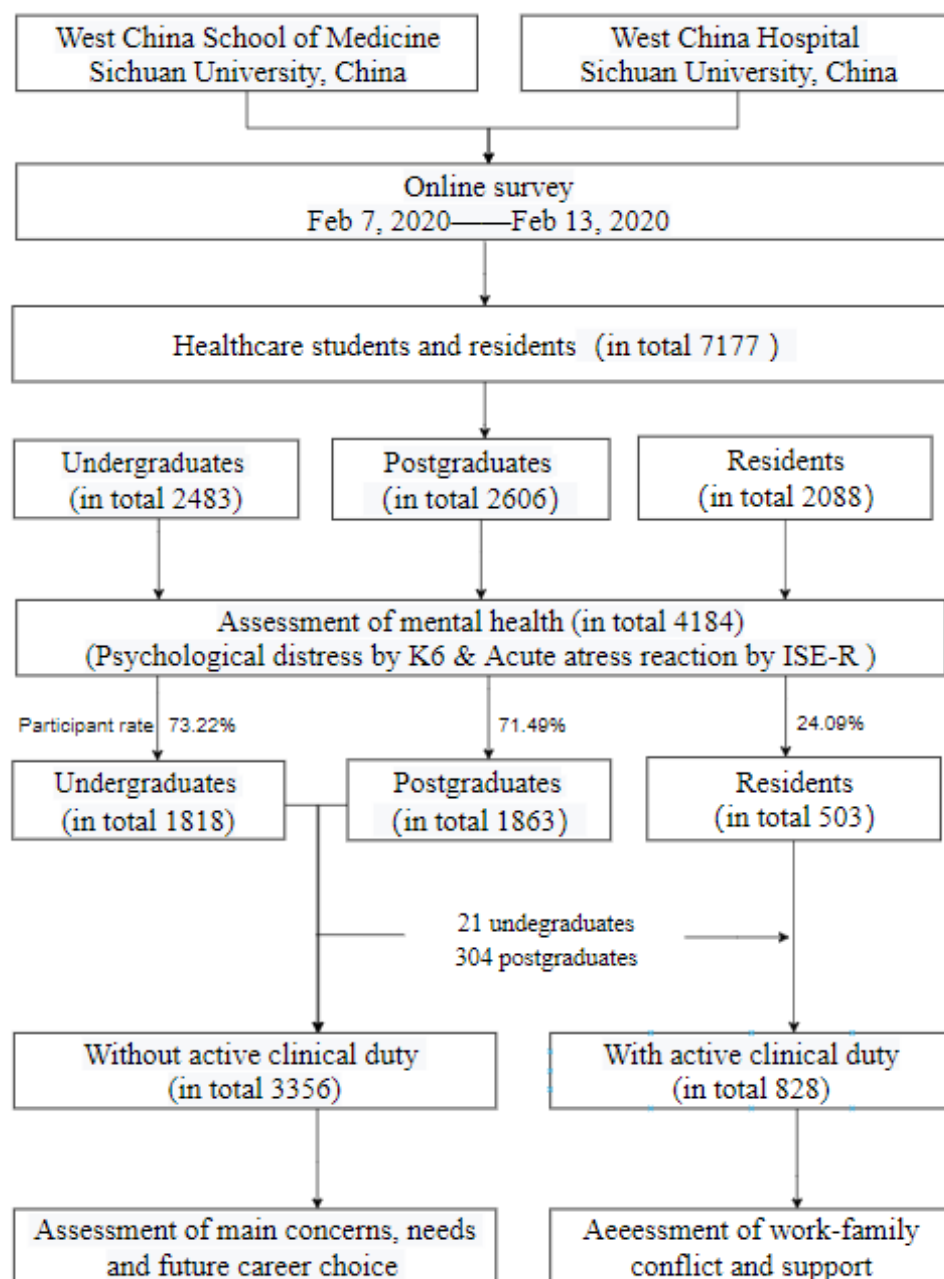

**Supplemental Text:****Demographic information**

- a) Age: \_\_\_\_\_ years
- b) Sex: A male, B female
- c) Training stage: A undergraduate, B postgraduate, C residency
- d) Training program: A medicine, B medical technology, C nursing
- e) Marital status: A married, B unmarried
- f) Location: \_\_\_\_\_ (current)
- g) Have you had relatives infected with COVID-19?  
A. No            B. Yes
- h) Are you actively performing clinical duties at this time?  
A. No            B. Yes

If Yes, go on:

- i) Working position: \_\_\_\_\_ department.
- ii) Since the outbreak, have you contacted with COVID-19 patients?  
A. Yes        B. No
- iii) Work-family conflict and support  
Since the outbreak,
  - a) my current job has made it difficult for me to care for my family.
  - b) family responsibilities have affected my work.
  - c) I had difficulties in juggling work and family.
  - d) I can get support from my family.
  - e) I can get support from my colleagues.
  - f) I can get support from my leader.
  - g) The hospital's holiday arrangement is reasonable.
  - h) The hospital's duty arrangement is reasonable.
  - i) The hospital has had a flexible policy that allowed me to juggle family and work.

If No, go on:

- i) Concerns during the outbreak (Multiple choices)  
Under the current circumstances, I am concerned about
  - a) being infected with the novel coronavirus;
  - b) my physical health condition;
  - c) my psychological health;
  - d) academic performance;
  - e) my social life and work;
  - f) my traveling plans;
  - g) the risk of infection from family members or friends;
  - h) my personal and family's financial situation;
  - i) other issues.
- ii) Needs during the outbreak (Multiple choices)

If I were to work during the outbreak, I would need

- a) personal protective equipment;
- b) social insurance;
- c) salary incentives;
- d) clinical practice guidance;
- e) professional track record;
- f) other needs.

iii) The influence on future career choice (single question)

Has the outbreak affected your future career plans? i) Healthcare worker; ii) Medicine-related, but not bedside; iii) Outside of medicine; iv) Indeterminate.

### **Psychological distress**

Since the COVID-19 outbreak,

- a) How often did you feel nervous?
- b) How often did you feel hopeless?
- c) How often did you feel restless or fidgety?
- d) How often did you feel so depressed that nothing could cheer you up?
- e) How often did you feel that everything was an effort?
- f) How often did you feel worthless?

### **Acute stress reaction**

During the past seven days concerning the COVID-19 outbreak, how much have you been distressed or bothered by these difficulties?

- a) Any reminder brought back feelings about it.
- b) I had trouble staying asleep.
- c) Other things kept making me think about it.
- d) I felt irritable and angry.
- e) I avoided letting myself get upset when I thought about it or reminded me of it.
- f) I thought about it when I did not mean to.
- g) I felt as if it had not happened or was not real.
- h) I stayed away from reminders of it.
- i) Pictures about it popped into my mind.
- j) I was jumpy and easily startled.
- k) I tried not to think about it.
- l) I was aware that I still had many feelings about it, but I did not deal with them.
- m) My feelings about it were kind of numb.
- n) I found myself acting or feeling like I was back at that time.
- o) I had trouble falling asleep.
- p) I had waves of strong feelings about it.
- q) I tried to remove it from my memory.
- r) I had trouble concentrating.
- s) Reminders of it caused me to have physical reactions, such as sweating, trouble breathing, nausea, or a pounding heart.

- t) I had dreams about it.
- u) I felt watchful and on-guard.
- v) I tried not to talk about it.
